# Supplementary material
Source: PubMed Central journal article supplement (PMC6891892)
Supplement: mmc1.pdf [file mmc1.pdf]

# THE LANCET

## Supplementary appendix

This appendix formed part of the original submission and has been peer reviewed. We post it as supplied by the authors.

Supplement to: Taylor WRJ, Thriemer K, von Seidlein L, et al. Short-course primaquine for the radical cure of *Plasmodium vivax* malaria: a multicentre, randomised, placebo-controlled non-inferiority trial. *Lancet* 2019; published online July 18. [http://dx.doi.org/10.1016/S0140-6736\(19\)31285-1](http://dx.doi.org/10.1016/S0140-6736(19)31285-1).

## Supplementary Appendices

Supplement to: Short course primaquine for the radical cure of Plasmodium vivax malaria: a randomised placebo-controlled multicentre trial

### Table of Contents

|     |                                                                                                                                                       |    |
|-----|-------------------------------------------------------------------------------------------------------------------------------------------------------|----|
| 1.  | <i>Map of Study Sites</i> .....                                                                                                                       | 3  |
| 2.  | <i>Information About Study Sites</i> .....                                                                                                            | 4  |
| 3.  | <i>List of Ethics Review Boards and Regulatory Agencies</i> .....                                                                                     | 6  |
| 4.  | <i>Sample Size and Power Calculation</i> .....                                                                                                        | 8  |
| 5.  | <i>Primaquine Dosing of Tablets</i> .....                                                                                                             | 9  |
| 6.  | <i>Primaquine Suspension Dosing of Children Under 23 kgs</i> .....                                                                                    | 10 |
| 7.  | <i>Microscopy Quality Control Results</i> .....                                                                                                       | 11 |
| 8.  | <i>Statistical Methods</i> .....                                                                                                                      | 14 |
| 9.  | <i>Consort Flow Chart</i> .....                                                                                                                       | 16 |
| 10. | <i>Site-specific Baseline Tables</i> .....                                                                                                            | 17 |
| 11. | <i>Scatterplots of Total Dose of PQ Received by Weight</i> .....                                                                                      | 19 |
| 12. | <i>Adherence and Total Dose of Drug Received</i> .....                                                                                                | 20 |
| 13. | <i>Parasite and Fever Clearance</i> .....                                                                                                             | 21 |
| 14. | <i>Histogram of the number of symptomatic P. vivax recurrences in each treatment arm</i> .....                                                        | 22 |
| 15. | <i>Site Specific Results for the Primary Endpoint – Incidence Rate of Recurrent Symptomatic Episodes of P. vivax within 12 months Follow up</i> ..... | 23 |
| 16. | <i>Per protocol Analysis</i> .....                                                                                                                    | 24 |
| 17. | <i>Sensitivity Analyses in the ITT Population</i> .....                                                                                               | 25 |
| 18. | <i>Site-Specific ITT Hazard Ratios (HR) and Incidence Rate Ratios (IRR)</i> .....                                                                     | 28 |
|     | a) PQ7 vs PQ14: Risks and rates for recurrent parasitemia due to symptomatic and any infection due to <i>P. vivax</i> .....                           | 28 |
|     | b) PQ7 vs PQ14: Risks and rates for recurrent parasitemia due to symptomatic and any infection due to <i>P. falciparum</i> .....                      | 29 |
|     | c) PQ7 vs Pq14: Risks and rates for recurrent parasitemia due to symptomatic and any infection due to all <i>Species</i> .....                        | 30 |

|                                                                                                                                     |    |
|-------------------------------------------------------------------------------------------------------------------------------------|----|
| d) PQ7 vs Control: Risks and rates for recurrent parasitemia due to symptomatic and any infection due to <i>P. vivax</i> .....      | 31 |
| e) PQ7 vs Control: Risks and rates for recurrent parasitemia due to symptomatic and any infection due to <i>P. falciparum</i> ..... | 32 |
| f) PQ7 vs Control: Risks and rates for recurrent parasitemia due to symptomatic and any infection due to all <i>species</i> .....   | 33 |
| g) PQ14 vs Control: Risks and rates for recurrent parasitemia due to symptomatic and any infection due <i>P. vivax</i> .....        | 34 |
| h) PQ14 vs Control: Risks and rates for recurrent parasitemia due to symptomatic and any infection due <i>P. falciparum</i> .....   | 35 |
| i) PQ14 vs Control: Risks and rates for recurrent parasitemia due to symptomatic and any infection due all <i>species</i> .....     | 36 |
| 19. <i>Site-specific Kaplan Meier Curves for Symptomatic P. vivax Recurrence</i> .....                                              | 37 |
| 20. <i>Details of SAEs</i> .....                                                                                                    | 38 |
| 21. <i>Site Specific Adverse Events</i> .....                                                                                       | 41 |
| 22. <i>Details of AEs</i> .....                                                                                                     | 44 |
| 23. <i>Symptoms Elicited from Daily Questionnaires During Treatment between Days 1 and 3</i> .....                                  | 45 |
| 24. <i>Symptoms elicited from daily questionnaires during treatment – Days 4 to 14</i> .....                                        | 49 |
| 25. <i>Distribution of haemoglobin (g/dL) during follow up by treatment arm</i> .....                                               | 53 |
| 26. <i>Haemoglobin Profile by Treatment Arm</i> .....                                                                               | 54 |

# 1. Map of Study Sites

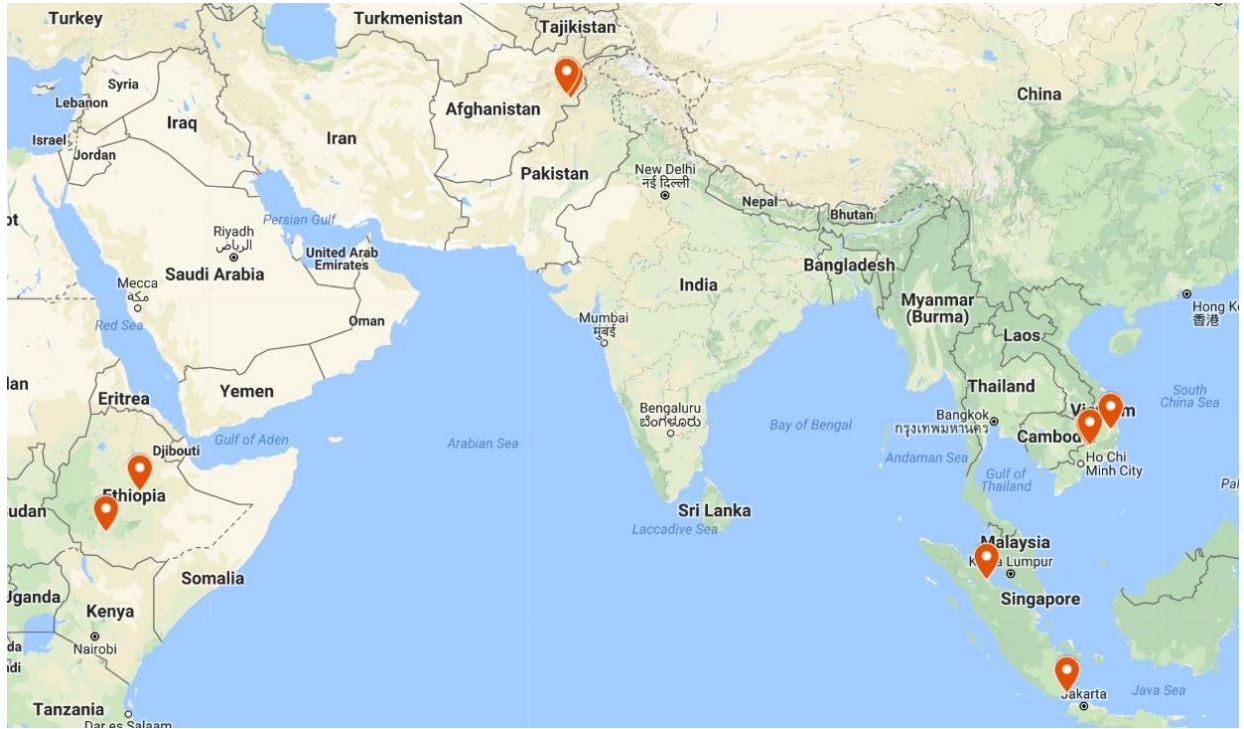

## 2. Information About Study Sites

|                                       | Afghanistan                                                                                                                                                               |                                                             | Ethiopia                                                                                                                                 |                                      | Indonesia                                                                                                                                   |                                    | Vietnam                                                                                                                                   |                                                                     |
|---------------------------------------|---------------------------------------------------------------------------------------------------------------------------------------------------------------------------|-------------------------------------------------------------|------------------------------------------------------------------------------------------------------------------------------------------|--------------------------------------|---------------------------------------------------------------------------------------------------------------------------------------------|------------------------------------|-------------------------------------------------------------------------------------------------------------------------------------------|---------------------------------------------------------------------|
| Site Name                             | Jalalabad                                                                                                                                                                 | Laghman                                                     | Arba Minch                                                                                                                               | Metahara                             | Hanura                                                                                                                                      | Tanjung Leidong                    | Dak O & Bu Gia Map                                                                                                                        | Krong Pa                                                            |
| Site Code                             | AF001                                                                                                                                                                     | AF008                                                       | ET001                                                                                                                                    | ET002                                | ID004                                                                                                                                       | ID005                              | VN001                                                                                                                                     | VN002                                                               |
| Name of study center                  | Speen-Ghar Teaching Hospital                                                                                                                                              | Laghman, Mihterlam hospital                                 | Arba Minch Hospital                                                                                                                      | Metehara Sugar Factory Hospital      | Hanura Primary Health Center                                                                                                                | Tanjung Leidong                    | Dak-O & Bu Gia Map Commune Health Stations                                                                                                | Krong Pa Medical Center                                             |
| Study center GPS coordinates          | 34.4344/<br>70.4612                                                                                                                                                       | 34.6891/<br>70.1467                                         | 6.025204/<br>37.556696                                                                                                                   | 8.8875/<br>39.9169444                | -5.320619/<br>105.622958                                                                                                                    | 2.698056/<br>99.901667             | 12.047594/<br>107.093178                                                                                                                  | 13.221819/<br>108.682475                                            |
| Altitude above sea level              | 575 m                                                                                                                                                                     | 779m                                                        | 1285m                                                                                                                                    | 946 m                                | 15 – 65 m                                                                                                                                   | 5m                                 | 338-408 m                                                                                                                                 | 136 m                                                               |
| Treatment policy (incl. G6PD testing) | <b>Pf:</b> AL+PQ (single dose 0.25 mg/kg)<br><b>Pv:</b> CQ+PQ (0.25 mg/kg for 14 days)<br><b>G6Pd testing</b> recommended. If not available, weekly PQ course recommended |                                                             | <b>Pf:</b> AL+PQ (single dose 0.25 mg/kg)<br><b>Pv:</b> CQ+PQ (0.25 mg/kg for 14 days)<br><b>G6PD testing</b> not explicitly recommended |                                      | <b>Pf:</b> DHP+PQ (single dose 0.25 mg/kg)<br><b>Pv:</b> DHP+PQ (0.25 mg/kg for 14 days).<br><b>G6PD testing</b> not explicitly recommended |                                    | <b>Pf:</b> DHP+PQ (single dose 0.25 mg/kg)<br><b>Pv:</b> CQ+PQ (0.25 mg/kg for 14 days)<br><b>G6PD testing</b> not explicitly recommended |                                                                     |
| G6PD prevalence and variants          | Mediterranean variant 7% in many ethnic groups <sup>1</sup>                                                                                                               | Mediterranean variant 7% in many ethnic groups <sup>1</sup> | Unknown, likely A- and Mediterranean                                                                                                     | Unknown, likely A- and Mediterranean | Unknown                                                                                                                                     | 2.7%, Mahidol variant <sup>2</sup> | Vientiane & Mahidol (Kinh = 2% Ethnic minorities: 10%) <sup>3</sup>                                                                       | Vientiane & Mahidol (Kinh = 2% Ethnic minorities: 10%) <sup>3</sup> |

<sup>1</sup> Jamornthanyawat N, Awab GR, Tanomsing N, *et al* A Population Survey of the Glucose-6-Phosphate Dehydrogenase (G6PD) 563C>T (Mediterranean) Mutation in Afghanistan. *PLoS One* 2014; 9(2):e88605.

<sup>2</sup> Pasaribu AP, Chokejindachai W, Sirivichayakul C, *et al*. A randomised comparison of dihydroartemisinin-piperazine and artesunate-amodiaquine combined with primaquine for radical treatment of vivax malaria in Sumatera, Indonesia. *J Infect Dis* 2013 ;208(11):1906-13. doi: 10.1093/infdis/jit407.

<sup>3</sup> Personal communication Hien Tran Tinh

|                                                     |                                                                                                                                                                                            |                                                                          |                                  |                                                 |                                  |                                         |                                                   |                                                   |
|-----------------------------------------------------|--------------------------------------------------------------------------------------------------------------------------------------------------------------------------------------------|--------------------------------------------------------------------------|----------------------------------|-------------------------------------------------|----------------------------------|-----------------------------------------|---------------------------------------------------|---------------------------------------------------|
| <b>Approx. catchment population of study center</b> | 356,274                                                                                                                                                                                    | 100,000                                                                  | 164,529                          | 22,0259 <sup>7</sup>                            | 35,692                           | 21,191                                  | 22,000                                            | 70,000                                            |
| <b>Seasonality of malaria</b>                       | May to Nov (peak in summer /July), Pf is confined to Oct-Nov)                                                                                                                              | May to Nov (peak in summer /July), Pf is confined to Oct-Nov)            | Year round with peak at Dec- Feb | Peak malaria Sept-October, smaller season April | Peak season November and march   | Year round, peak between July-December  | Peak malaria season October to April              | Peak malaria season October to January            |
| <b>P.v./ P.f. ratio</b>                             | 95:5                                                                                                                                                                                       | 90:10                                                                    | 30:70                            | 40:60 <sup>7</sup>                              | 40:60 <sup>4</sup>               | 95:5                                    | 40:60                                             | 40:60                                             |
| <b>Relapse periodicity</b>                          |                                                                                                                                                                                            |                                                                          | 3-5 months <sup>5</sup>          | 3-5 months <sup>5</sup>                         | 3 months                         | 3 months                                | 45 days                                           | 3 months                                          |
| <b>Vectors</b>                                      | <i>An. stephensi</i><br><i>An. culicifacies</i><br><i>An. fluviatilis</i><br><i>An. Annularis</i><br><i>An. Pulcherrimus</i><br><i>An. superpictus</i><br><i>An. hycranus</i> <sup>6</sup> | <i>A. stephensi</i><br><i>A. subpictus</i> and<br><i>A. culicifacies</i> | <i>A.arabiensis</i> <sup>7</sup> | <i>A.arabiensis</i> <sup>7</sup>                | <i>A. sundaicus</i> <sup>8</sup> | Not known, probably <i>A. sundaicus</i> | <i>A. dirus</i><br><i>A. minimus</i> <sup>9</sup> | <i>A. dirus</i><br><i>A. minimus</i> <sup>9</sup> |
| <b>API</b>                                          | 3.5 per 1,000 per year <sup>10</sup>                                                                                                                                                       | 1.62 per 1,000 per year                                                  | unknown                          | unknown                                         | 43.9 per 1,000 per year          | 49 per 1,000 per year <sup>11</sup>     | 50 per 1,000 year <sup>12</sup>                   | 8.5 per 1,000 year <sup>12</sup>                  |

<sup>4</sup> Based on screening data from within IMPROV study

<sup>5</sup> Abreha T, Hwang J, Thriemer K, *et al.* Comparison of artemether-lumefantrine and chloroquine with and without primaquine for the treatment of Plasmodium vivax infection in Ethiopia: A randomised controlled trial. *PLoS Med* 2017 ;14(5):e1002299. doi: 10.1371/journal.pmed.1002299

<sup>6</sup> Rowland M, Mohammad N, Rehman H, *et al.* Anopheline vectors and malaria transmission in eastern Afghanistan. *Trans. R. Soc. Trop. Med. Hyg.* 2002; 15 (11): 17530-9. .

<sup>7</sup> Based on Federal democratic republic of Ethiopia population census commission, summary and statistical report of the 2007 population and housing census. 2008

<sup>8</sup> Sukowati S, Shinta, Suwito, *et al.* Some aspect of behavior of Malaria vector Anopheles sundaicus (Theobald) in Lampung, Sumatera. *J Ekol Kesehatan.* 2011;10(4):267–78.

<sup>9</sup> Son DH, Thuy-Nhien N, von Seidlein L, *et al.* The prevalence, incidence and prevention of Plasmodium falciparum infections in forest rangers in Bu Gia Map National Park, Binh Phuoc province, Vietnam: a pilot study. *Malar J.* 2017; 16: 444.

<sup>10</sup> Based on the national strategic plan for malaria control to elimination in Afghanistan 2018-2022 by the Ministry of Public Health, Afghanistan

<sup>11</sup> Based on data from the Ministry of Health on annual parasite incidence (API) in 2016

<sup>12</sup> Based on reports of the National Malaria Control Program (NMCP of Vietnam) in 2017

### 3. List of Ethics Review Boards and Regulatory Agencies

|                       |                                                                                                                                                                                                                                                                                                                                                                                                                                      |
|-----------------------|--------------------------------------------------------------------------------------------------------------------------------------------------------------------------------------------------------------------------------------------------------------------------------------------------------------------------------------------------------------------------------------------------------------------------------------|
| <b>Australia</b>      | <p><b>The Human Research Ethics Committee of the Northern Territory Department of Health (HREC)</b><br/>         John Mathews Building (Bldg 58)<br/>         Royal Darwin Hospital Campus, Rock<br/>         PO Box: 41096, Casuarina NT 0811, Australia<br/>         Website: <a href="http://www.menzies.edu.au">www.menzies.edu.au</a></p>                                                                                       |
| <b>United Kingdom</b> | <p><b>The Oxford Tropical Research Ethics Committee (OxTREC)</b><br/>         University of Oxford<br/>         Research Services, University Offices<br/>         Wellington Square, Oxford OX1 2JD<br/>         Tel: +44 (0) 1865 (2) 82106<br/>         E-mail: <a href="mailto:oxtrece@admin.ox.ac.uk">oxtrece@admin.ox.ac.uk</a><br/>         Website: <a href="http://www.admin.ox.ac.uk/rso/">www.admin.ox.ac.uk/rso/</a></p> |
| <b>Afghanistan</b>    | <p><b>Islamic Republic of Afghanistan, Ministry of Public Health, Institutional Review Board</b><br/>         3<sup>rd</sup> floor of Main Building of Ministry of Public Health<br/>         Masoud Circle, Wazir Akbar Khan, Kabul-Afghanistan<br/>         Tel: +93(0) 20 29 22 435<br/>         email: <a href="mailto:anphi@moph.gov.af">anphi@moph.gov.af</a></p>                                                              |
| <b>Ethiopia</b>       | <p><b>The National Research Ethics Review Committee (NRERC)</b><br/>         Addis Ababa, Ethiopia<br/>         PO Box: 2490<br/>         Tel: +251 114-674-353<br/>         E-mail: <a href="mailto:most@ethionet.et">most@ethionet.et</a><br/>         Fax: +251 114-660-241<br/>         Website: <a href="http://www.most.gov.et">www.most.gov.et</a></p>                                                                        |
|                       | <p><b>Scientific &amp; Ethical Review Committee (SERC)</b><br/>         Ethiopian Public Health Institute<br/>         Addis Ababa, Ethiopia<br/>         PO Box: 1242/5654<br/>         E-mail: <a href="mailto:ephi@ethionet.et">ephi@ethionet.et</a><br/>         Tel: +251 11 2133499, +251 11 2751522<br/>         Fax: +251 11 2758634<br/>         Website: <a href="http://www.ephi.gov.et">www.ephi.gov.et</a></p>          |
|                       | <p><b>The Food Medicine and Health Care Administration and Control Authority (FMHACA)</b><br/>         Addis Ababa, Ethiopia<br/>         Tel: 251-11-552 41 22/552 41 23<br/>         E-mail: <a href="mailto:regulatory@fmaca.gov.et">regulatory@fmaca.gov.et</a><br/>         Fax: 251-11-552 13 92<br/>         PO Box: 5681</p>                                                                                                 |

|                  |                                                                                                                                                                                                                                                                                                                                                                |
|------------------|----------------------------------------------------------------------------------------------------------------------------------------------------------------------------------------------------------------------------------------------------------------------------------------------------------------------------------------------------------------|
| <b>Indonesia</b> | <p><b>The Health Research Ethics Committee of the Faculty of Medicine University of Indonesia</b><br/>                 Cipto Mangunkusumo Hospital<br/>                 Jalan Salemba Raya No. 6, Jakarta Pusat 10430<br/>                 Tel: 021-3157008<br/>                 E-mail: ec_fkui@yahoo.com</p>                                                 |
|                  | <p><b>Indonesian Food and Drug Agency (BPOM)</b><br/>                 Jl, Percetakan Negara No. 23 Jakarta Pusat 10560 Indonesia<br/>                 E-mail: infopom@indo.net.id;<br/>                 Tel: (021) 4244691, 4209221, 4263333, 4244755, 4241781, 4244819<br/>                 Fax: (02) 4245139<br/>                 Website: www.pom.go.id</p> |
| <b>Vietnam</b>   | <p><b>The Ministry of Health Evaluation Committee on Ethics in Biomedical Research</b><br/>                 138A Giang Vo Street, Ba Dinh District, Ha Noi, Viet Nam<br/>                 Email: iecmoh@gmail.com<br/>                 Tel: +84 4 6273 2156</p>                                                                                                |



## 4. Sample Size and Power Calculation

The primary aim of this trial was to demonstrate non-inferiority of a 7-day primaquine regimen to the standard 14-day primaquine regimen with respect to incidence rate of symptomatic vivax parasitaemia over 12 months. The sample size calculation was based on an assumed incidence rate of 0.2 infections per person-year in both arms, a non-inferiority margin of 0.07 infections per person-year and a one-sided significance level of 2.5%. Based on these assumptions, a total sample size of 1200 evaluable patients, randomly allocated to receive a primaquine regimen (600 patients in each treatment arm), followed for one year were calculated to provide a power of 80% to show non-inferiority or, equivalently, that the two-sided 95% confidence interval for the difference in incidence rate of malaria between the two arms excludes an excess rate of 0.07 infections per person-year or more in favour of the 14-day regimen.

A further 300 patients in the control arm were also followed for one year. With 300 patients in the control arm and 600 patients in each treatment arm (i.e. 75 controls and 150 patients in each treatment arm at each of the five study sites), the study had 95% power and 95% confidence to detect a difference (i.e. a superiority comparison of either regimen) at each of the study sites assuming an incidence rate of 0.2 infections per person-year in each of the treatment arms and 0.6 infections per person-year in the control arm (ranging from 0.2 in the Indian subcontinent and 1.0 in Vietnam and Indonesia). The combined proportion of losses to follow-up and major protocol violations was expected to be no more than 20%, so to account for this, a total of 1875 G6PD normal patients (750 per treatment arm; 375 in the control arm) were aimed to be randomised in this trial.

The inclusion of two additional sites in Ethiopia increased the sample size by 25% and increased the power to detect non-inferiority between the PQ7 and PQ14 arms to 86%, and the power to detect superiority between PQ7/PQ14 and placebo to 99.8%.

## 5. Primaquine Dosing of Tablets

Patient weight was rounded to the nearest integer

| Weight Band | Weight/kg | PQ7                         |            | PQ14                        |             |
|-------------|-----------|-----------------------------|------------|-----------------------------|-------------|
|             |           | 1 mg/kg/day                 | mg/kg      | 0.5 mg/kg/day               | mg/kg       |
| A           | 5 to 22   | see suspension dosing chart |            | see suspension dosing chart |             |
| A           | 23-34     | 30                          | 0.88 - 1.3 | 15                          | 0.44 - 0.65 |
| B           | 35-45     | 45                          | 1 - 1.29   | 22.5                        | 0.5 - 0.64  |
| C           | ≥ 46      | 60                          | ≤1.33      | 30                          | ≤0.67       |

## 6. Primaquine Suspension Dosing of Children Under 23 kgs

| Weight | ml/day | 7 day Primaquine Regimen (PQ7)<br>Two 15mg tablets dissolved in 5ml syrup (1ml=6mg) |                         |                     |                  | 14 day Primaquine regimen (PQ14)<br>One 15mg tablet dissolved in 5ml syrup (1ml=3mg) |                         |                     |                  |
|--------|--------|-------------------------------------------------------------------------------------|-------------------------|---------------------|------------------|--------------------------------------------------------------------------------------|-------------------------|---------------------|------------------|
|        |        | Daily dose in mg/day                                                                | Daily dose in mg/kg/day | Total dose in mg/kg | Total dose in mg | Daily dose in mg/day                                                                 | Daily dose in mg/kg/day | Total dose in mg/kg | Total dose in mg |
| 5      | 0.8    | 4.8                                                                                 | 0.96                    | 6.72                | 33.6             | 2.4                                                                                  | 0.48                    | 6.72                | 33.6             |
| 6      | 1      | 6                                                                                   | 1                       | 7                   | 42               | 3                                                                                    | 0.5                     | 7                   | 42               |
| 7      | 1.2    | 7.2                                                                                 | 1.03                    | 7.2                 | 50.4             | 3.6                                                                                  | 0.51                    | 7.2                 | 50.4             |
| 8      | 1.3    | 7.8                                                                                 | 0.98                    | 6.83                | 54.6             | 3.9                                                                                  | 0.49                    | 6.83                | 54.6             |
| 9      | 1.5    | 9                                                                                   | 1                       | 7                   | 63               | 4.5                                                                                  | 0.5                     | 7                   | 63               |
| 10     | 1.7    | 10.2                                                                                | 1.02                    | 7.14                | 71.4             | 5.1                                                                                  | 0.51                    | 7.14                | 71.4             |
| 11     | 1.8    | 10.8                                                                                | 0.98                    | 6.87                | 75.6             | 5.4                                                                                  | 0.49                    | 6.87                | 75.6             |
| 12     | 2      | 12                                                                                  | 1                       | 7                   | 84               | 6                                                                                    | 0.5                     | 7                   | 84               |
| 13     | 2.2    | 13.2                                                                                | 1.02                    | 7.11                | 92.4             | 6.6                                                                                  | 0.51                    | 7.11                | 92.4             |
| 14     | 2.3    | 13.8                                                                                | 0.99                    | 6.9                 | 96.6             | 6.9                                                                                  | 0.49                    | 6.9                 | 96.6             |
| 15     | 2.5    | 15                                                                                  | 1                       | 7                   | 105              | 7.5                                                                                  | 0.5                     | 7                   | 105              |
| 16     | 2.5    | 15                                                                                  | 0.94                    | 6.56                | 105              | 7.5                                                                                  | 0.47                    | 6.56                | 105              |
| 17     | 3      | 18                                                                                  | 1.06                    | 7.41                | 126              | 9                                                                                    | 0.53                    | 7.4                 | 126              |
| 18     | 3      | 18                                                                                  | 1                       | 7                   | 126              | 9                                                                                    | 0.5                     | 7                   | 126              |
| 19     | 3      | 18                                                                                  | 0.95                    | 6.63                | 126              | 9                                                                                    | 0.47                    | 6.63                | 126              |
| 20     | 3      | 18                                                                                  | 0.9                     | 6.3                 | 126              | 9                                                                                    | 0.45                    | 6.3                 | 126              |
| 21     | 3.5    | 21                                                                                  | 1                       | 7                   | 147              | 10.5                                                                                 | 0.5                     | 7                   | 147              |
| 22     | 3.5    | 21                                                                                  | 0.95                    | 6.68                | 147              | 10.5                                                                                 | 0.48                    | 6.68                | 147              |

## 7. Microscopy Quality Control Results

Standard thick (using 6 µl blood on a 12 mm diameter template) and thin malaria films were prepared at each visit for Giemsa staining (3%, 40-50 min) according to procedures based on the Research Malaria Microscopy Standards.<sup>13</sup>

|                           |                                                                      |                  |               |
|---------------------------|----------------------------------------------------------------------|------------------|---------------|
| <b>All sites combined</b> | Readable slides with available data                                  | 4361             | --            |
|                           | Slides with asexual parasitaemia                                     | 2603             | 59.7%         |
|                           | <i>P. falciparum</i>                                                 | 112              | 2.6%          |
|                           | <i>P. falciparum</i> - mixed                                         | 26               | 0.6%          |
|                           | Non- <i>P. falciparum</i>                                            | 2465             | 56.5%         |
|                           | Negative (no asexual parasitaemia)                                   | 1480             | 33.9%         |
|                           | Accuracy (%)                                                         | 4281/4361        | 98.6%         |
|                           | Parasite density discordance                                         | 1625             | 62.4%         |
|                           | <b>Overall sensitivity</b>                                           | <b>2531/2603</b> | <b>97.2%</b>  |
|                           | <b>Overall specificity</b>                                           | <b>1471/1480</b> | <b>99.4%</b>  |
|                           | <b>Kappa statistics for asexual parasite detection &amp; species</b> | <b>0.93</b>      | [0.92 - 0.94] |
| <b>AF001 Jalalabad</b>    | Readable slides with available data                                  | 447              | --            |
|                           | Slides with asexual parasitaemia                                     | 223              | 49.9%         |
|                           | <i>P. falciparum</i>                                                 | 4                | 0.9%          |
|                           | <i>P. falciparum</i> - mixed                                         | 2                | 0.4%          |
|                           | Non- <i>P. falciparum</i>                                            | 217              | 48.5%         |
|                           | Negative (no asexual parasitaemia)                                   | 224              | 50.1%         |
|                           | Accuracy (%)                                                         | 415/447          | 92.8%         |
|                           | Parasite density discordance                                         | 140              | 62.8%         |
|                           | <b>Overall sensitivity</b>                                           | <b>192/223</b>   | <b>86.1%</b>  |
|                           | <b>Overall specificity</b>                                           | <b>222/224</b>   | <b>99.1%</b>  |
|                           | <b>Kappa statistics for asexual parasite detection &amp; species</b> | <b>0.82</b>      | [0.76 - 0.87] |
| <b>AF008 Laghman</b>      | Readable slides with available data                                  | 329              | --            |
|                           | Slides with asexual parasitaemia                                     | 197              | 59.9%         |
|                           | <i>P. falciparum</i>                                                 | 0                | 0.0%          |
|                           | <i>P. falciparum</i> - mixed                                         | 0                | 0.0%          |

<sup>13</sup> WHO Special Programme for Research and Training in Tropical Diseases. Microscopy for the detection, identification and quantification of malaria parasites on stained thick and thin blood films in research settings, 2015. [https://www.who.int/tdr/publications/microscopy\\_detec\\_ident\\_quantif/en/](https://www.who.int/tdr/publications/microscopy_detec_ident_quantif/en/)

|                             |                                                                      |                |               |
|-----------------------------|----------------------------------------------------------------------|----------------|---------------|
|                             | Non- <i>P. falciparum</i>                                            | 197            | 59.9%         |
|                             | Negative (no asexual parasitaemia)                                   | 132            | 40.1%         |
|                             | Accuracy (%)                                                         | 320/329        | 97.3%         |
|                             | Parasite density discordance                                         | 152            | 77.2%         |
|                             | <b>Overall sensitivity</b>                                           | <b>188/197</b> | <b>95.4%</b>  |
|                             | <b>Overall specificity</b>                                           | <b>132/132</b> | <b>100.0%</b> |
|                             | <b>Kappa statistics for asexual parasite detection &amp; species</b> | <b>0.94</b>    | [0.90 - 0.98] |
|                             |                                                                      |                |               |
| <b>ET001<br/>Arba Minch</b> | Readable slides with available data                                  | 826            | --            |
|                             | Slides with asexual parasitaemia                                     | 335            | 40.6%         |
|                             | <i>P. falciparum</i>                                                 | 15             | 1.8%          |
|                             | <i>P. falciparum</i> - mixed                                         | 3              | 0.4%          |
|                             | Non- <i>P. falciparum</i>                                            | 317            | 38.4%         |
|                             | Negative (no asexual parasitaemia)                                   | 224            | 27.1%         |
|                             | Accuracy (%)                                                         | 817/826        | 99.0%         |
|                             | Parasite density discordance                                         | 158            | 47.2%         |
|                             | <b>Overall sensitivity</b>                                           | <b>326/335</b> | <b>97.3%</b>  |
|                             | <b>Overall specificity</b>                                           | <b>224/224</b> | <b>100.0%</b> |
|                             | <b>Kappa statistics for asexual parasite detection &amp; species</b> | <b>0.96</b>    | [0.93 - 0.98] |
|                             |                                                                      |                |               |
| <b>ET002<br/>Metahara</b>   | Readable slides with available data                                  | 340            | --            |
|                             | Slides with asexual parasitaemia                                     | 211            | 62.1%         |
|                             | <i>P. falciparum</i>                                                 | 5              | 1.5%          |
|                             | <i>P. falciparum</i> - mixed                                         | 0              | 0.0%          |
|                             | Non- <i>P. falciparum</i>                                            | 206            | 60.6%         |
|                             | Negative (no asexual parasitaemia)                                   | 118            | 34.7%         |
|                             | Accuracy (%)                                                         | 332/340        | 97.6%         |
|                             | Parasite density discordance                                         | 80             | 37.9%         |
|                             | <b>Overall sensitivity</b>                                           | <b>198/211</b> | <b>93.8%</b>  |
|                             | <b>Overall specificity</b>                                           | <b>118/118</b> | <b>100.0%</b> |
|                             | <b>Kappa statistics for asexual parasite detection &amp; species</b> | <b>0.90</b>    | [0.85 - 0.95] |
|                             |                                                                      |                |               |
| <b>ID004<br/>Hanura</b>     | Readable slides with available data                                  | 1117           | --            |
|                             | Slides with asexual parasitaemia                                     | 716            | 64.1%         |
|                             | <i>P. falciparum</i>                                                 | 37             | 3.3%          |
|                             | <i>P. falciparum</i> - mixed                                         | 10             | 0.9%          |
|                             | Non- <i>P. falciparum</i>                                            | 669            | 59.9%         |
|                             | Negative (no asexual parasitaemia)                                   | 401            | 35.9%         |
|                             | Accuracy (%)                                                         | 1107/1117      | 99.1%         |
|                             |                                                                      |                |               |

|                               |                                                                      |                |               |
|-------------------------------|----------------------------------------------------------------------|----------------|---------------|
|                               | Parasite density discordance                                         | 500/716        | 69.8%         |
|                               | <b>Overall sensitivity</b>                                           | <b>709/716</b> | <b>99.0%</b>  |
|                               | <b>Overall specificity</b>                                           | <b>398/401</b> | <b>99.3%</b>  |
|                               | <b>Kappa statistics for asexual parasite detection &amp; species</b> | <b>0.92</b>    | [0.90 - 0.94] |
| <b>ID005</b>                  |                                                                      |                |               |
| <b>Tanjung Leidong</b>        | Readable slides with available data                                  | 630            | --            |
|                               | Slides with asexual parasitaemia                                     | 376            | 59.7%         |
|                               | <i>P. falciparum</i>                                                 | 0              | 0.0%          |
|                               | <i>P. falciparum</i> - mixed                                         | 0              | 0.0%          |
|                               | Non- <i>P. falciparum</i>                                            | 376            | 59.7%         |
|                               | Negative (no asexual parasitaemia)                                   | 254            | 40.3%         |
|                               | Accuracy (%)                                                         | 616/630        | 97.8%         |
|                               | Parasite density discordance                                         | 295/376        | 78.5%         |
|                               | <b>Overall sensitivity</b>                                           | <b>366/376</b> | <b>97.3%</b>  |
|                               | <b>Overall specificity</b>                                           | <b>250/254</b> | <b>98.4%</b>  |
|                               | <b>Kappa statistics for asexual parasite detection &amp; species</b> | <b>0.95</b>    | [0.93 - 0.98] |
| <b>VN001</b>                  |                                                                      |                |               |
| <b>Dak O &amp; Bu Gia Map</b> | Readable slides with available data                                  | 485            | --            |
|                               | Slides with asexual parasitaemia                                     | 295            | 60.8%         |
|                               | <i>P. falciparum</i>                                                 | 26             | 5.4%          |
|                               | <i>P. falciparum</i> - mixed                                         | 3              | 0.6%          |
|                               | Non- <i>P. falciparum</i>                                            | 266            | 54.8%         |
|                               | Negative (no asexual parasitaemia)                                   | 190            | 39.2%         |
|                               | Accuracy (%)                                                         | 484/485        | 99.8%         |
|                               | Parasite density discordance                                         | 25             | 8.5%          |
|                               | <b>Overall sensitivity</b>                                           | <b>295/295</b> | <b>100.0%</b> |
|                               | <b>Overall specificity</b>                                           | <b>189/190</b> | <b>99.5%</b>  |
|                               | <b>Kappa statistics for asexual parasite detection &amp; species</b> | <b>0.96</b>    | [0.94 - 0.98] |
| <b>VN002</b>                  |                                                                      |                |               |
| <b>Krong Pa</b>               | Readable slides with available data                                  | 187            | --            |
|                               | Slides with asexual parasitaemia                                     | 109            | 58.3%         |
|                               | <i>P. falciparum</i>                                                 | 0              | 0.0%          |
|                               | <i>P. falciparum</i> - mixed                                         | 0              | 0.0%          |
|                               | Non- <i>P. falciparum</i>                                            | 109            | 58.3%         |
|                               | Negative (no asexual parasitaemia)                                   | 78             | 41.7%         |
|                               | Accuracy (%)                                                         | 185/187        | 98.9%         |
|                               | Parasite density discordance                                         | 27             | 24.8%         |
|                               | <b>Overall sensitivity</b>                                           | <b>107/109</b> | <b>98.2%</b>  |
|                               | <b>Overall specificity</b>                                           | <b>78/78</b>   | <b>100.0%</b> |
|                               | <b>Kappa statistics for asexual parasite detection &amp; species</b> | <b>0.98</b>    | [0.95 - 1.00] |

## 8. Statistical Methods

Full details of the Statistical Analysis Plan are available in the published protocol and associated supplementary files<sup>14</sup>.

All statistical analyses were performed using Stata v14 (StataCorp, College Station, TX, USA).

### Baseline characteristics

Patient and disease characteristics at baseline were summarised by study arm using means [SD], medians (25<sup>th</sup> – 75<sup>th</sup> percentile), geometric mean [SD (log scale), 95% reference range] and frequencies (proportion).

### Summary of efficacy endpoints

Efficacy endpoints including early treatment failure (recurrent parasitaemia within 3 days), and recurrence within 28, 42, and 365 days were summarised by treatment arm. The primary efficacy endpoint, incidence rate of symptomatic *P. vivax* recurrence, was calculated as the number of symptomatic *P. vivax* recurrences per person-year, with censoring at 365 days. This approach was also followed for the incidence rate of any (and symptomatic) *P. falciparum* and *P. spp* infections, and any *P. vivax* recurrences. Incidence risks of *P. vivax* considered only the first *P. vivax* recurrence (regardless of symptoms) and were calculated using the Kaplan-Meier method with censoring at the time of failure or a non-*vivax* infection, or at 28 days, 42 days, or 365 days. The same approach was applied for the incidence risks of symptomatic *P. vivax* recurrence, any (and symptomatic) *P. falciparum* recurrence, and any (and symptomatic) *P. spp* recurrence. The proportion of patients with patent *P. vivax* parasitaemia or fever on day one, two, and three following the initial enrolment treatment on day 0, and the proportion of patients with patent *P. falciparum* parasitaemia or fever on day one, two, and three following an initial *P. falciparum* recurrence, was calculated by treatment arm.

### Efficacy endpoints

To assess the primary efficacy endpoint for radical cure, the absolute incidence rate difference in symptomatic *P. vivax* recurrences (mono-infection or mixed) per person-year between the 7-day arm and the 14-day arm was estimated using weighted least squares regression with a robust standard error<sup>15</sup> [Xu et al. 2010], and a non-inferiority margin of 0.07 recurrences per person-year. To assess the secondary efficacy endpoints, incidence rate ratios were estimated using negative binomial regression (analysis of all recurrences), and cumulative incidence risks and hazard ratios were estimated using the Kaplan-Meier method and Cox regression (analysis of time to the first recurrence), with comparisons between the 7-day and control arms, the 14-day and control arms, and the 7-day and 14-day arms. The main analysis was done in the ITT (Intention to Treat) population; analyses were repeated in the PP (Per Protocol) population.

### Further details on incidence rate analyses, including sensitivity analyses:

In the analysis of incidence rates (both differences and ratios), follow-up time began at enrolment and patients were censored at 365 days. The effect of post-treatment prophylaxis was assessed in a sensitivity

<sup>14</sup> Improv Study Group. Improving the radical cure of vivax malaria (IMPROV): a study protocol for a multicentre randomised, placebo-controlled comparison of short and long course primaquine regimens. *BMC Infect Dis*, 2015; **15**: 558

<sup>15</sup> Xu Y, Cheung YB, Lam KF, et al. A simple approach to the estimation of incidence rate difference. *Am J Epidemiol*. 2015; **172**(3):334-43.

analysis subtracting 28 days from a patient's follow-up time for each antimalarial treatment, irrespective of the drug. To determine the effect of providing open primaquine to all patients after the 3<sup>rd</sup> symptomatic *P. vivax* recurrence in Vietnam rather than after the 4<sup>th</sup> at other sites, two sensitivity analyses were performed – 1) excluding Vietnam; and 2) including Vietnam but censoring all patients at the time point of the 3<sup>rd</sup> recurrence at other sites.

### **Censoring**

All analyses censored patients at the time of their last visit if they were lost to follow-up or if the intervention was discontinued. Patients were also censored from risk analyses on the day of initial parasitaemia (regardless of species or symptoms), on the day preceding a period of absence of 18 consecutive days prior to 42 days' follow-up, or two consecutive monthly visits after 42 days of follow-up. Additionally, schizontocidal efficacy analyses to 28 or 42 days censored patients at the day of the last blood smear prior to 25 or 39 days if no blood smear was taken between 25-31 or 39-45 days, respectively.

### **Heterogeneity between sites**

For all efficacy endpoints within 365 days (radical cure), coefficients and their standard errors were first estimated within each study arm using the statistical methods described above (see **Efficacy Endpoints**) and heterogeneity was assessed visually using Forrest plots. Random effects meta-analysis was used to estimate the  $I^2$  value for heterogeneity across sites, and the pooled measure of association across sites was presented unless there was substantial heterogeneity. There were too few events to assess heterogeneity between study sites in the analysis of secondary efficacy endpoints within 28 days and 42 days (schizontocidal efficacy).

### **Safety analysis - haemolysis**

The incidence risk of severe anaemia or transfusion within 365 days of follow-up was calculated using the Kaplan-Meier method within each treatment arm. Patients were censored at the time of failure, at the time of the last visit, or at the last visit immediately prior to missing two or more scheduled haemoglobin measurements. There were too few outcomes for comparison between arms. The nadir of haemoglobin within 28 days and the time to nadir was summarised within treatment arms; patients who missed two or more consecutive scheduled haemoglobin measurements were excluded. Nadirs were compared between arms using linear regression adjusting for site. The median day of nadir was compared between study arms using a nonparametric K-sample test on the equality of medians. The mean and standard deviation of haemoglobin on day 0, 3, 7, and 13 (or 14 in the G6PD arm), and the mean [SD] change in haemoglobin from day 0 to days 3, 7, and 13 (or 14 in the G6PD arm), was calculated within each arm. Additionally, the proportion of patients whose haemoglobin dropped more than 5 g/dL or more than 25% from day 0 to days 3, 7, and 13 (or 14 in the G6PD arm) was calculated within each arm. Comparisons in mean changes between arms was done using linear-mixed effects modelling adjusting for site, with random effects for the intercept and slope, and an interaction parameter between the day of measurement and the study arm.

### **Safety analysis – adverse events**

Adverse events (AEs) within 42 days of initial treatment were summarised within each treatment arm, by severity (only grade 3 and 4) and in relation to primaquine. The number of patients with AEs within 7, 14, 28, and 42 days of initial treatment was calculated within each arm, by relation to primaquine, to assess trends in the incidence of adverse events over time. All serious adverse events (SAEs) are reported and presented by relation to study drug and severity.



## 9. Consort Flow Chart

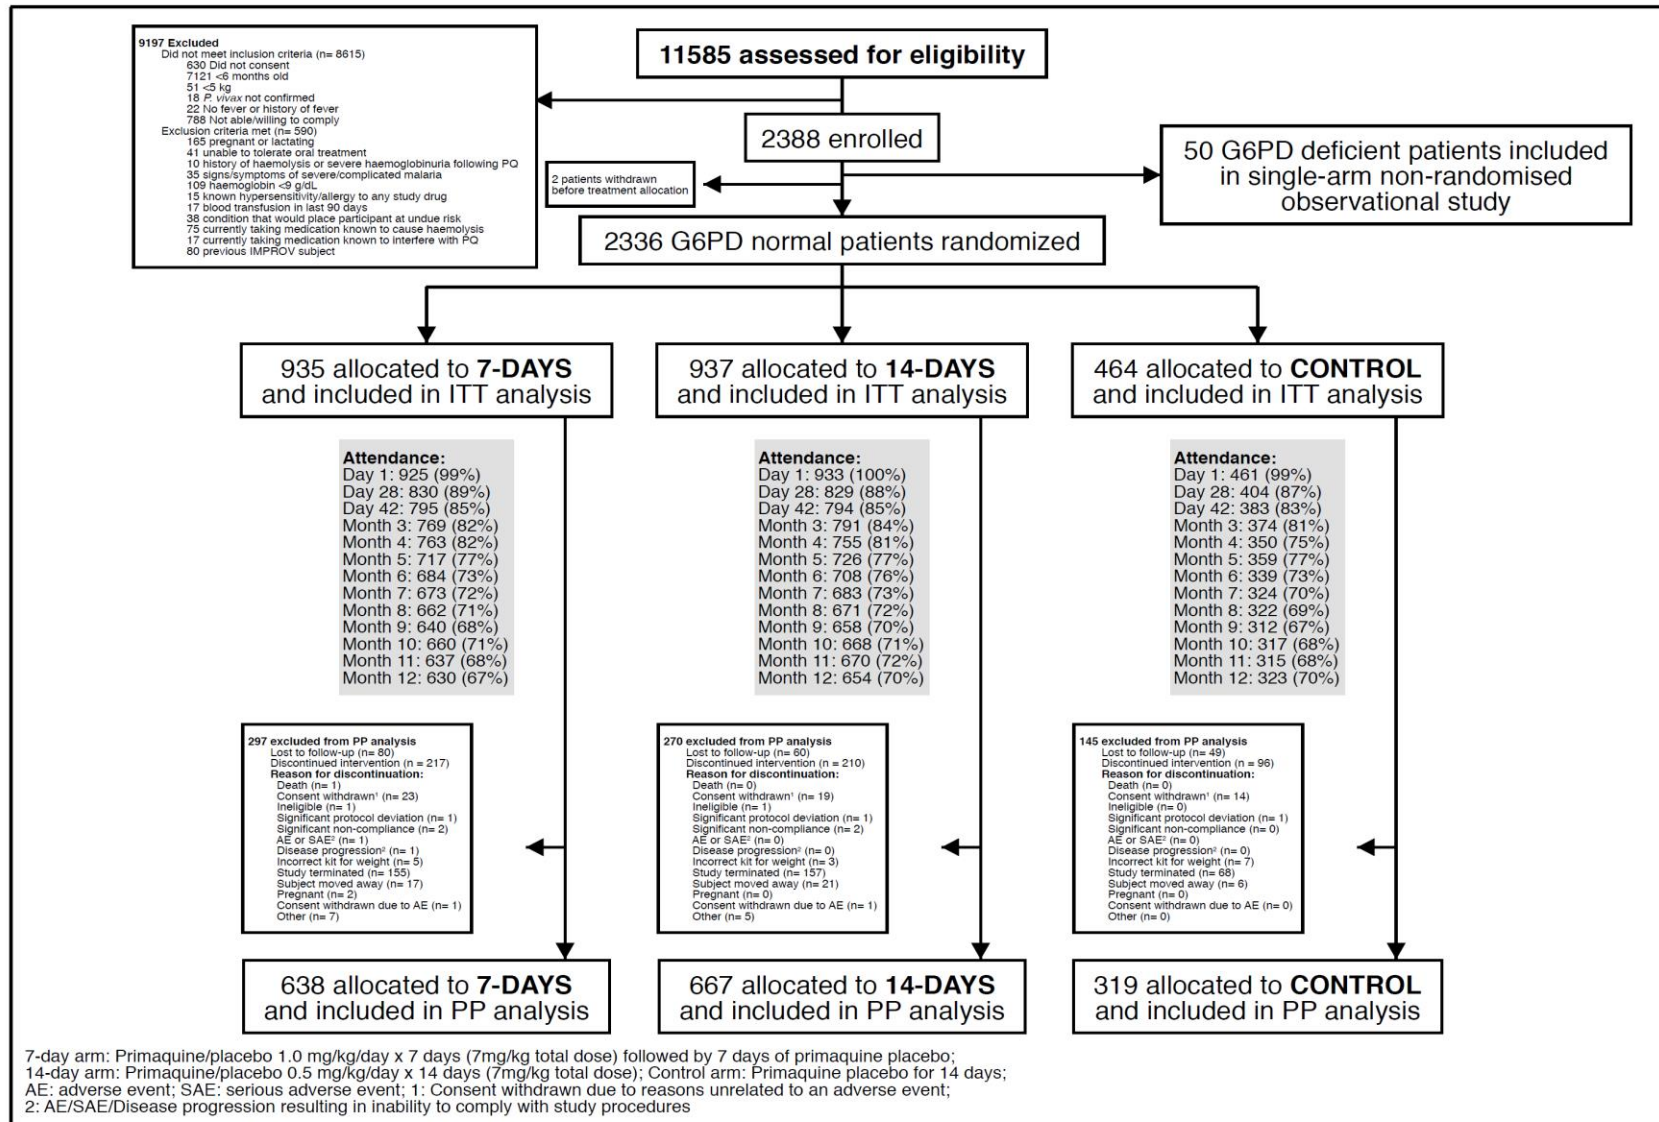

## 10. Site-specific Baseline Tables

|                                      |                  | Afghanistan           |                       | Ethiopia              |                       | Indonesia             |                             | Vietnam                        |                       | Total                 |
|--------------------------------------|------------------|-----------------------|-----------------------|-----------------------|-----------------------|-----------------------|-----------------------------|--------------------------------|-----------------------|-----------------------|
|                                      |                  | AF001<br>Jalalabad    | AF008<br>Laghman      | ET001<br>Arba Minch   | ET002<br>Metahara     | ID004<br>Hanura       | ID005<br>Tanjung<br>Leidong | VN001<br>Dak O & Bu<br>Gia Map | VN002<br>Krong Pa     |                       |
|                                      |                  | N=311                 | N=120                 | N=371                 | N=209                 | N=575                 | N=425                       | N=219                          | N=106                 | N=2,336               |
| <b>Age (years),<br/>median (IQR)</b> |                  | 14.0<br>(9.0 - 22.0)  | 11.0<br>(7.5 - 16.0)  | 16.0<br>(10.0 - 20.0) | 16.0<br>(11.0 - 27.0) | 14.0<br>(8.0 - 27.0)  | 17.0<br>(11.0 - 30.0)       | 22.0<br>(16.0 - 32.0)          | 25.0<br>(22.0 - 30.0) | 16.0<br>(10.0 - 26.0) |
| <b>Age category<br/>N (%)</b>        | 6-12<br>months   | 1<br>(0.3%)           | 1<br>(0.8%)           | 0<br>(0.0%)           | 0<br>(0.0%)           | 1<br>(0.2%)           | 0<br>(0.0%)                 | 0<br>(0.0%)                    | 0<br>(0.0%)           | 3<br>(0.1%)           |
|                                      | >=1 & <5<br>yrs  | 22<br>(7.1%)          | 5<br>(4.2%)           | 43<br>(11.6%)         | 11<br>(5.3%)          | 50<br>(8.7%)          | 19<br>(4.5%)                | 1<br>(0.5%)                    | 0<br>(0.0%)           | 151<br>(6.5%)         |
|                                      | >=5 & <15<br>yrs | 135<br>(43.4%)        | 79<br>(65.8%)         | 119<br>(32.1%)        | 72<br>(34.4%)         | 264<br>(45.9%)        | 144<br>(33.9%)              | 40<br>(18.3%)                  | 3<br>(2.8%)           | 856<br>(36.6%)        |
|                                      | >=15 yrs         | 153<br>(49.2%)        | 35<br>(29.2%)         | 209<br>(56.3%)        | 126<br>(60.3%)        | 260<br>(45.2%)        | 262<br>(61.6%)              | 178<br>(81.3%)                 | 103<br>(97.2%)        | 1,326<br>(56.8%)      |
| <b>Sex N (%)</b>                     | Male             | 234<br>(75.2%)        | 71<br>(59.2%)         | 195<br>(52.6%)        | 136<br>(65.1%)        | 300<br>(52.2%)        | 251<br>(59.1%)              | 184<br>(84.0%)                 | 96<br>(90.6%)         | 1,467<br>(62.8%)      |
|                                      | Female           | 77<br>(24.8%)         | 49<br>(40.8%)         | 176<br>(47.4%)        | 73<br>(34.9%)         | 275<br>(47.8%)        | 174<br>(40.9%)              | 35<br>(16.0%)                  | 10<br>(9.4%)          | 869<br>(37.2%)        |
| <b>Weight (kg)<br/>median (IQR)</b>  |                  | 41.0 (22.5 -<br>61.3) | 31.9 (21.8 -<br>46.9) | 47.0 (24.0 -<br>58.0) | 47.1 (29.0 -<br>55.5) | 38.0 (21.3 -<br>52.0) | 49.0 (27.4 -<br>58.1)       | 52.0 (45.0 -<br>60.0)          | 55.0 (52.0 -<br>60.0) | 46.6 (26.0 -<br>57.0) |
| <b>Weight<br/>category N<br/>(%)</b> | 5-9.9 kg         | 2<br>(0.6%)           | 1<br>(0.8%)           | 7<br>(1.9%)           | 0<br>(0.0%)           | 5<br>(0.9%)           | 2<br>(0.5%)                 | 0<br>(0.0%)                    | 0<br>(0.0%)           | 17<br>(0.7%)          |
|                                      | 10-22.9 kg       | 78<br>(25.1%)         | 34<br>(28.3%)         | 69<br>(18.6%)         | 28<br>(13.4%)         | 158<br>(27.5%)        | 69<br>(16.2%)               | 13<br>(5.9%)                   | 0<br>(0.0%)           | 449<br>(19.2%)        |
|                                      | 23-34.9 kg       | 55<br>(17.7%)         | 33<br>(27.5%)         | 47<br>(12.7%)         | 38<br>(18.2%)         | 95<br>(16.5%)         | 63<br>(14.8%)               | 14<br>(6.4%)                   | 1<br>(0.9%)           | 346<br>(14.8%)        |
|                                      | 35-45.9 kg       | 31<br>(10.0%)         | 21<br>(17.5%)         | 56<br>(15.1%)         | 32<br>(15.3%)         | 95<br>(16.5%)         | 47<br>(11.1%)               | 29<br>(13.2%)                  | 9<br>(8.5%)           | 320<br>(13.7%)        |
|                                      | 46+ kg           | 145<br>(46.6%)        | 31<br>(25.8%)         | 192<br>(51.8%)        | 111<br>(53.1%)        | 222<br>(38.6%)        | 244<br>(57.4%)              | 163<br>(74.4%)                 | 96<br>(90.6%)         | 1,204<br>(51.5%)      |

|                                                                         |                       |                       |                         |                      |                      |                        |                       |                       |                       |
|-------------------------------------------------------------------------|-----------------------|-----------------------|-------------------------|----------------------|----------------------|------------------------|-----------------------|-----------------------|-----------------------|
| <b><i>P. vivax</i> parasites/uL - geometric mean (95% normal range)</b> | 1347<br>(278 - 17500) | 1830<br>(221 - 10935) | 12090<br>(722 - 135000) | 2237<br>(45 - 77500) | 1379<br>(52 - 13833) | 6334<br>(1615 - 17896) | 7639<br>(749 - 32500) | 6952<br>(593 - 52500) | 3440<br>(140 - 53037) |
| <b>Gametocytes present N (%)</b>                                        | 311<br>(100.0%)       | 1<br>(0.8%)           | 371<br>(100.0%)         | 207<br>(99.0%)       | 574<br>(99.8%)       | 425<br>(100.0%)        | 219<br>(100.0%)       | 106<br>(100.0%)       | 2,214<br>(94.8%)      |
| <b>Gametocytes /uL - geometric mean (95% normal range)</b>              | 441<br>(74-17500)     | 56<br>(. - .)         | 664<br>(56 - 3093)      | 499<br>(30 - 9701)   | 38<br>(3.7 - 307)    | 141<br>(30 - 578)      | 109<br>(15 - 734)     | 403<br>(19 - 15000)   | 201<br>(15 - 3037)    |
| <b>Temperature (°C) mean [SD]</b>                                       | 37.6 [0.8]            | 37.7 [0.8]            | 37.3 [1.1]              | 37.4 [0.8]           | 37.7 [1.4]           | 38.0 [1.2]             | 38.7 [1.0]            | 39.0 [0.9]            | 37.8 [1.2]            |
| <b>Fever (Axillary &gt;37.5C or Oral &gt;38C) N (%)</b>                 | 177<br>(59.4%)        | 72<br>(60.0%)         | 138<br>(37.2%)          | 107<br>(51.2%)       | 288<br>(50.1%)       | 271<br>(63.8%)         | 193<br>(88.1%)        | 96<br>(90.6%)         | 1,342<br>(57.8%)      |
| <b>Haemoglobin (g/dL) mean [SD]</b>                                     | 13.3 [1.7]            | 12.5 [1.4]            | 13.2 [1.7]              | 13.0 [1.7]           | 12.4 [1.7]           | 12.9 [1.8]             | 13.5 [1.6]            | 13.6 [1.3]            | 13.0 [1.7]            |
| <b>Anemia (Hb &lt;10 g/dL) N (%)</b>                                    | 6<br>(1.9%)           | 4<br>(3.4%)           | 10<br>(2.7%)            | 4<br>(1.9%)          | 48<br>(8.3%)         | 15<br>(3.5%)           | 2<br>(0.9%)           | 0<br>(0.0%)           | 89<br>(3.8%)          |

### 11. Scatterplots of Total Dose of PQ Received by Weight

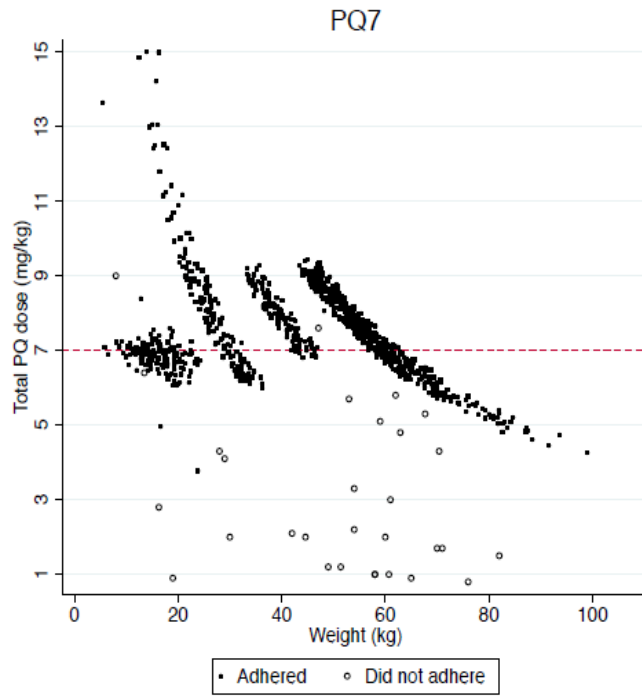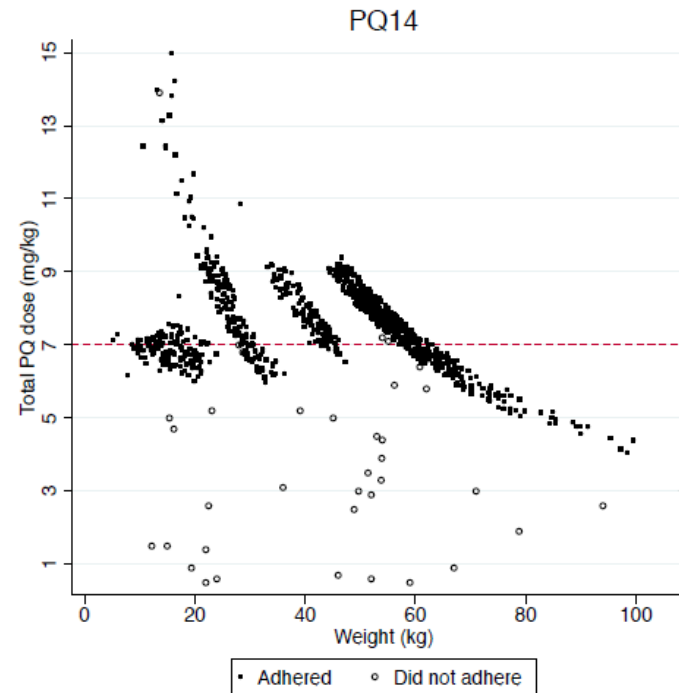

## 12. Adherence and Total Dose of Drug Received

|                                                                                                  | <b>Control</b> | <b>PQ7</b>                               | <b>PQ14</b>                              |
|--------------------------------------------------------------------------------------------------|----------------|------------------------------------------|------------------------------------------|
|                                                                                                  | N=464          | N=935                                    | N=937                                    |
| Number of patients (%) with incomplete treatment until day 7 <sup>1,2</sup>                      | 11 (2.4%)      | 30 (3.2%)                                | 19 (2.0%)                                |
| Number of patients (%) with incomplete treatment until day 14 <sup>1,3</sup>                     | 14 (3.0%)      | 53 (5.7%)                                | 37 (3.9%)                                |
| Number of patients with interrupted treatment (> 1 day) <sup>1</sup>                             |                | 125 (13.8%)                              | 218 (24.2%)                              |
| Total Dose PQ received (mg/kg) – all patients <sup>1</sup>                                       |                | 7.39 [SD: 1.53]<br>(range: 0.80 - 15.00) | 7.39 [SD 1.48]<br>(range: 0.50 - 15.00)  |
| Total Dose PQ received (mg/kg) – only patients who received full course <sup>1</sup>             |                | 7.53 [SD: 1.28]<br>(range: 3.80 - 15.00) | 7.54 [SD: 1.19]<br>(range: 4.20 - 15.00) |
| Total Dose PQ received (mg/kg) – only patients who received incomplete course <sup>1, 2, 3</sup> |                | 3.16 [SD: 2.22],<br>(range: 0.80- 9.00)  | 3.74 [SD 2.71]<br>(range: 0.50-13.90)    |
| <sup>1</sup> only recruitment episode                                                            |                |                                          |                                          |
| <sup>2</sup> incomplete treatment was defined as less than 7 doses                               |                |                                          |                                          |
| <sup>3</sup> incomplete treatment was defined as less than 14 doses                              |                |                                          |                                          |

### 13. Parasite and Fever Clearance

|                                                                                                                                                                                                                                                                                                                                                                                              | Control         | PQ7             | PQ14            |
|----------------------------------------------------------------------------------------------------------------------------------------------------------------------------------------------------------------------------------------------------------------------------------------------------------------------------------------------------------------------------------------------|-----------------|-----------------|-----------------|
|                                                                                                                                                                                                                                                                                                                                                                                              | N=464           | N=935           | N=937           |
| Asexual <i>P. vivax</i> parasitaemia on Day 1                                                                                                                                                                                                                                                                                                                                                | 231/461 (50.1%) | 431/926 (46.5%) | 426/934 (45.6%) |
| Asexual <i>P. vivax</i> parasitaemia on Day 2                                                                                                                                                                                                                                                                                                                                                | 24/458 (5.2%)   | 34/919 (3.7%)   | 35/933 (3.8%)   |
| Asexual <i>P. vivax</i> parasitaemia on Day 3                                                                                                                                                                                                                                                                                                                                                | 1/457 (0.2%)    | 4/916 (0.4%)    | 3 /929(0.3%)    |
| Fever on Day 1                                                                                                                                                                                                                                                                                                                                                                               | 30/460 (6.5%)   | 75/918 (8.2%)   | 59/931 (8.2%)   |
| Fever on Day 2                                                                                                                                                                                                                                                                                                                                                                               | 5/458 (1.1%)    | 10/916 (1.1%)   | 5/931 (0.5%)    |
| Fever on Day 3                                                                                                                                                                                                                                                                                                                                                                               | 3/451 (0.7%)    | 3/909 (0.3%)    | 4/919 (0.4%)    |
| <p>The denominator is the number of patients who attended on the respective day.<br/>           Patients with missing temperature were excluded from the fever denominators, but patients without a blood smear were not excluded from the parasitaemia denominators.<br/>           Fever was defined as either an axillary temperature &gt;37.5°C or an oral temperature &gt; 38.0 °C.</p> |                 |                 |                 |

**14. Histogram of the number of symptomatic *P. vivax* recurrences in each treatment arm**

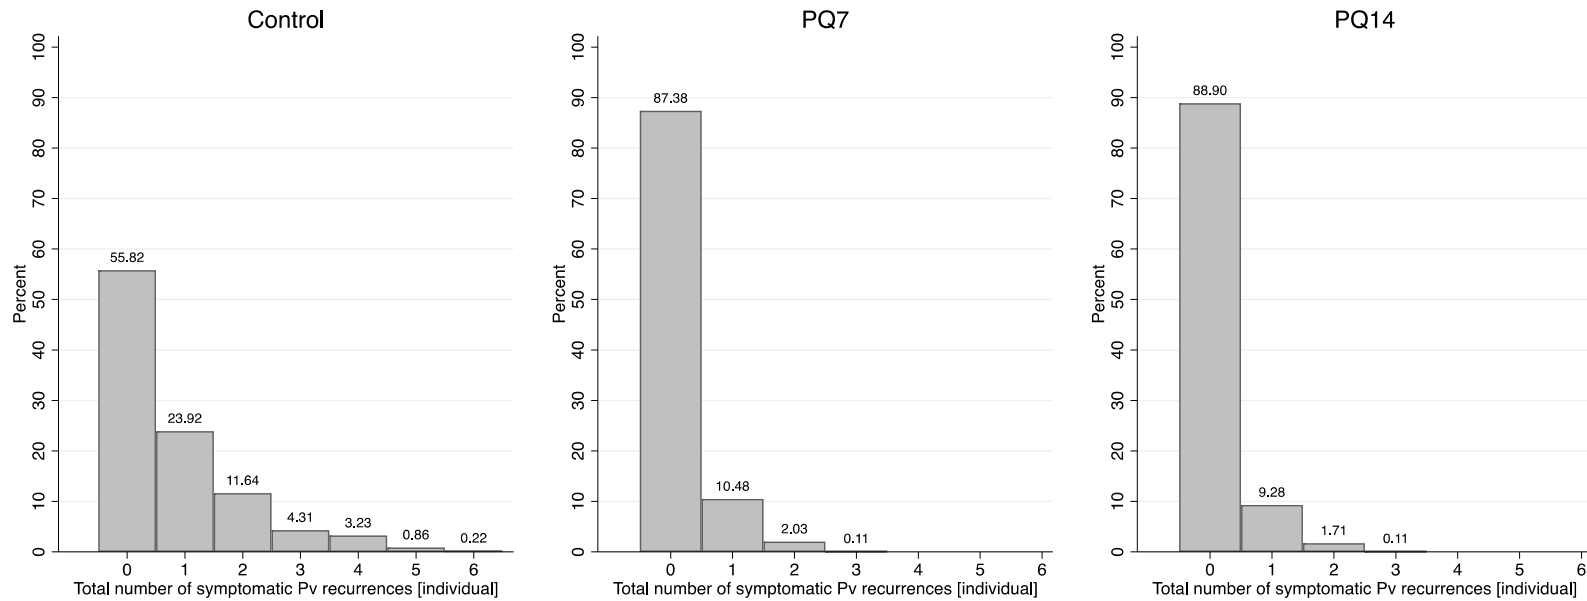

## 15. Site Specific Results for the Primary Endpoint – Incidence Rate of Recurrent Symptomatic Episodes of *P. vivax* within 12 months Follow up

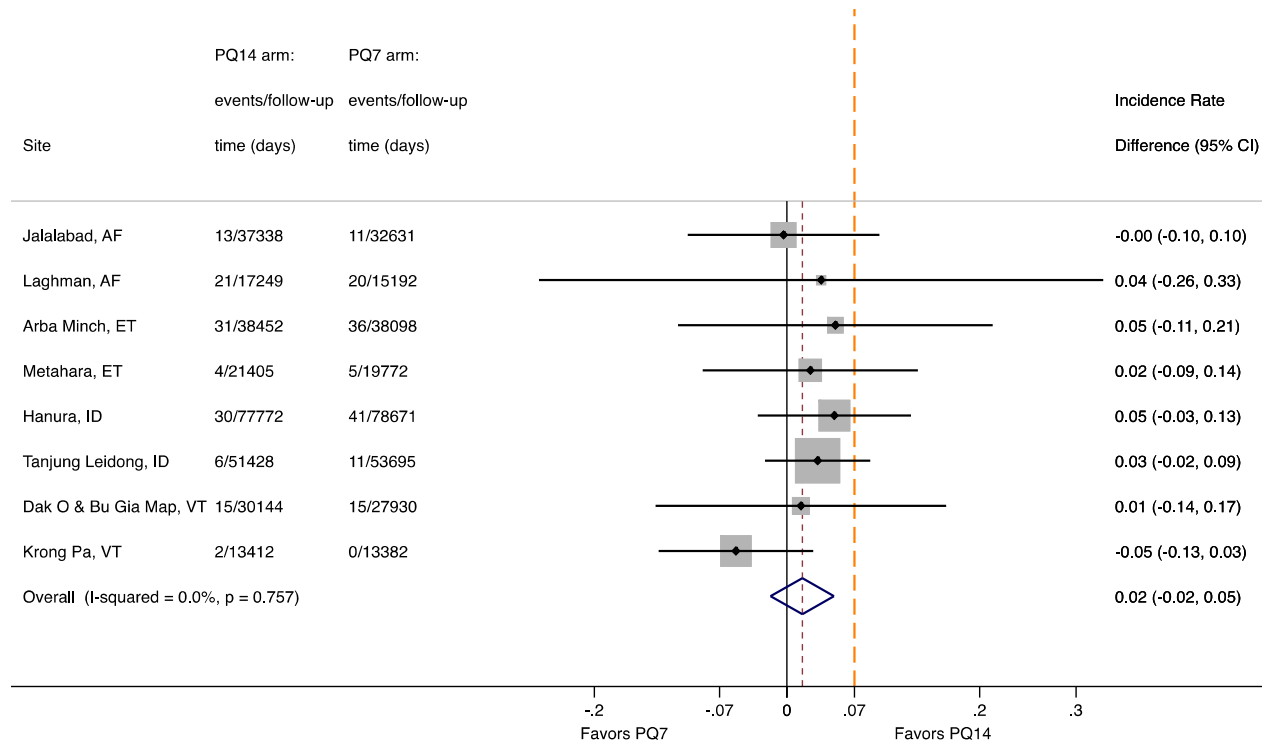

AF = Afghanistan; ET = Ethiopia; ID = Indonesia; VT = Vietnam

Absolute difference in incidence rates of symptomatic *P. vivax* between the 7-day and 14-day treatment arms: assessment of heterogeneity between study sites. The dashed orange line indicates the non-inferiority margin (incidence rate difference of 0.07 events per person-year). The incidence rate difference was estimated for each site using weighted least squares regression with a robust standard error; random effects meta-analysis was used to estimate the  $I^2$  value for heterogeneity and the overall incidence rate difference across all sites.



## 16. Per protocol Analysis

Excludes patients who discontinued treatment and were lost to follow up.

| Time point | Outcome                                                                                                      | Measure of association                           | PQ7 vs Control                                        | PQ14 vs Control                                       | PQ7 vs PQ14                                          |
|------------|--------------------------------------------------------------------------------------------------------------|--------------------------------------------------|-------------------------------------------------------|-------------------------------------------------------|------------------------------------------------------|
| 12 months  | Symptomatic <i>P. vivax</i> parasitaemia                                                                     | Pooled IRD*, (95%CI); p-value, [I <sup>2</sup> ] |                                                       |                                                       | 0.02 (-0.02 - 0.05); 0.4162, [I <sup>2</sup> = 0.00] |
|            |                                                                                                              | Pooled IRR, (95%CI); p-value, [I <sup>2</sup> ]  | 0.26 (0.20 - 0.35); <0.0001, [I <sup>2</sup> = 15.56] | 0.23 (0.17 - 0.29); <0.0001, [I <sup>2</sup> = 5.18]  | 1.18 (0.90 - 1.55); 0.2320, [I <sup>2</sup> = 0.00]  |
|            |                                                                                                              | Pooled HR, (95%CI); p-value, [I <sup>2</sup> ]   | 0.22 (0.15 - 0.34); <0.0001, [I <sup>2</sup> = 39.11] | 0.17 (0.11 - 0.26); <0.0001, [I <sup>2</sup> = 40.66] | 1.19 (0.77 - 1.83); 0.4332, [I <sup>2</sup> = 26.55] |
|            | Any <i>P. vivax</i> parasitaemia                                                                             | Pooled IRR, (95%CI); p-value, [I <sup>2</sup> ]  | 0.24 (0.18 - 0.33); <0.0001, [I <sup>2</sup> = 32.50] | 0.21 (0.15 - 0.29); <0.0001, [I <sup>2</sup> = 41.69] | 1.15 (0.88 - 1.49); 0.2980, [I <sup>2</sup> = 0.00]  |
|            |                                                                                                              | Pooled HR, (95%CI); p-value, [I <sup>2</sup> ]   | 0.21 (0.14 - 0.31); <0.0001, [I <sup>2</sup> = 44.79] | 0.17 (0.12 - 0.25); <0.0001, [I <sup>2</sup> = 38.48] | 1.16 (0.86 - 1.58); 0.3399, [I <sup>2</sup> = 0.00]  |
|            | Symptomatic <i>P. falciparum</i> parasitaemia                                                                | Pooled IRR, (95%CI); p-value, [I <sup>2</sup> ]  | 1.08 (0.67 - 1.73); 0.7540, [I <sup>2</sup> = 0.00]   | 0.85 (0.53 - 1.38); 0.5180, [I <sup>2</sup> = 0.00]   | 1.24 (0.83 - 1.84); 0.2950, [I <sup>2</sup> = 0.00]  |
|            |                                                                                                              | Pooled HR, (95%CI); p-value, [I <sup>2</sup> ]   | 0.67 (0.38 - 1.20); 0.1814, [I <sup>2</sup> = 0.00]   | 0.56 (0.31 - 1.01); 0.0560, [I <sup>2</sup> = 0.00]   | 1.15 (0.71 - 1.86); 0.5589, [I <sup>2</sup> = 0.00]  |
|            | Any <i>P. falciparum</i> parasitaemia                                                                        | Pooled IRR, (95%CI); p-value, [I <sup>2</sup> ]  | 1.09 (0.69 - 1.73); 0.7230, [I <sup>2</sup> = 0.00]   | 0.93 (0.58 - 1.48); 0.7560, [I <sup>2</sup> = 0.00]   | 1.14 (0.78 - 1.66); 0.5050, [I <sup>2</sup> = 0.00]  |
|            |                                                                                                              | Pooled HR, (95%CI); p-value, [I <sup>2</sup> ]   | 0.77 (0.46 - 1.29); 0.3292, [I <sup>2</sup> = 0.00]   | 0.65 (0.39 - 1.09); 0.1043, [I <sup>2</sup> = 0.00]   | 1.16 (0.76 - 1.75); 0.4970, [I <sup>2</sup> = 0.00]  |
|            | *Non-Inferiority analysis<br>HR= Hazard ratio<br>IRR= Incidence rate ratio<br>IRD= Incidence rate difference |                                                  |                                                       |                                                       |                                                      |

## 17. Sensitivity Analyses in the ITT Population

| Exclusion of data from the Vietnam sites <sup>1</sup>    |                                               |                                                          |                                                         |                                                         |                                                            |
|----------------------------------------------------------|-----------------------------------------------|----------------------------------------------------------|---------------------------------------------------------|---------------------------------------------------------|------------------------------------------------------------|
| Time point                                               | Outcome                                       | Measure of association                                   | PQ7 vs Control                                          | PQ14 vs Control                                         | PQ7 vs PQ14                                                |
| 12 months                                                | Symptomatic <i>P. vivax</i> parasitaemia      | Pooled IRD*, (95%CI); p-value, [I <sup>2</sup> ]         |                                                         |                                                         | 0.03 (-0.01 - 0.07);<br>0.1031<br>[I <sup>2</sup> = 0.00]  |
|                                                          |                                               | Pooled IRR, (95%CI); p-value, [I <sup>2</sup> ]          | 0.23 (0.17 - 0.30);<br><0.0001 [I <sup>2</sup> = 31.81] | 0.19 (0.13 - 0.26);<br><0.0001 [I <sup>2</sup> = 46.51] | 1.24 (0.95 - 1.63);<br>0.1150 [I <sup>2</sup> = 0.00]      |
|                                                          | Any <i>P. vivax</i> parasitaemia              | Pooled IRR, (95%CI); p-value, [I <sup>2</sup> ]          | 0.21 (0.16 - 0.28);<br><0.0001 [I <sup>2</sup> = 33.21] | 0.18 (0.13 - 0.25);<br><0.0001 [I <sup>2</sup> = 46.35] | 1.20 (0.93 - 1.55);<br>0.1702 [I <sup>2</sup> = 0.00]      |
|                                                          | Symptomatic <i>P. falciparum</i> parasitaemia | Pooled IRR, (95%CI); p-value, [I <sup>2</sup> ]          | 1.03 (0.65 - 1.64); 0.8882<br>[I <sup>2</sup> = 0.00]   | 0.72 (0.45 - 1.17); 0.1852<br>[I <sup>2</sup> = 0.00]   | 1.45 (0.97 - 2.15);<br>0.0703 [I <sup>2</sup> = 0.00]      |
|                                                          | Any <i>P. falciparum</i> parasitaemia         | Pooled IRR, (95%CI); p-value, [I <sup>2</sup> ]          | 1.12 (0.71 - 1.75); 0.6347<br>[I <sup>2</sup> = 0.00]   | 0.82 (0.51 - 1.30); 0.3935<br>[I <sup>2</sup> = 0.00]   | 1.39 (0.95 - 2.02);<br>0.0861 [I <sup>2</sup> = 0.00]      |
| Exclusion of data from the Indonesian sites <sup>2</sup> |                                               |                                                          |                                                         |                                                         |                                                            |
| 12 months                                                | Symptomatic <i>P. vivax</i> parasitaemia      | Pooled IRD*, p-value (95%CI); p-value, [I <sup>2</sup> ] |                                                         |                                                         | -0.01 (-0.06 - 0.04);<br>0.7250<br>[I <sup>2</sup> = 0.00] |
|                                                          |                                               | Pooled IRR, (95%CI); p-value, [I <sup>2</sup> ]          | 0.18 (0.12 - 0.28);<br><0.0001 [I <sup>2</sup> = 48.36] | 0.17 (0.11 - 0.26);<br><0.0001 [I <sup>2</sup> = 51.14] | 1.07 (0.78 - 1.46);<br>0.6807 [I <sup>2</sup> = 0.00]      |
|                                                          | Any <i>P. vivax</i> parasitaemia              | Pooled IRR, (95%CI); p-value, [I <sup>2</sup> ]          | 0.17 (0.11 - 0.26);<br><0.0001 [I <sup>2</sup> = 57.05] | 0.16 (0.10 - 0.24);<br><0.0001 [I <sup>2</sup> = 59.23] | 1.07 (0.79 - 1.44);<br>0.6772 [I <sup>2</sup> = 0.00]      |
|                                                          | Symptomatic <i>P. falciparum</i> parasitaemia | Pooled IRR, (95%CI); p-value, [I <sup>2</sup> ]          | 1.10 (0.62 - 1.96); 0.7495<br>[I <sup>2</sup> = 0.00]   | 0.81 (0.45 - 1.48); 0.5017<br>[I <sup>2</sup> = 0.00]   | 1.36 (0.85 - 2.18);<br>0.1986 [I <sup>2</sup> = 0.00]      |

|                                                                             |                                               |                                                  |                                                      |                                                      |                                                      |
|-----------------------------------------------------------------------------|-----------------------------------------------|--------------------------------------------------|------------------------------------------------------|------------------------------------------------------|------------------------------------------------------|
|                                                                             | Any <i>P. falciparum</i> parasitaemia         | Pooled IRR, (95%CI); p-value, [I <sup>2</sup> ]  | 1.23 (0.70 - 2.17); 0.4686 [I <sup>2</sup> = 0.00]   | 1.01 (0.57 - 1.79); 0.9661 [I <sup>2</sup> = 0.00]   | 1.22 (0.79 - 1.89); 0.3684 [I <sup>2</sup> = 0.00]   |
| <b>Censoring patients after their 3<sup>rd</sup> Recurrence<sup>3</sup></b> |                                               |                                                  |                                                      |                                                      |                                                      |
| <b>12 months</b>                                                            | Symptomatic <i>P. vivax</i> parasitaemia      | Pooled IRD*, (95%CI); p-value, [I <sup>2</sup> ] |                                                      |                                                      | 0.02 (-0.02 - 0.05); 0.3396 [I <sup>2</sup> = 0.00]  |
|                                                                             |                                               | Pooled IRR, (95%CI); p-value, [I <sup>2</sup> ]  | 0.21 (0.15 - 0.29); <0.0001 [I <sup>2</sup> = 45.80] | 0.18 (0.13 - 0.25); <0.0001 [I <sup>2</sup> = 39.93] | 1.19 (0.92 - 1.53); 0.1884 [I <sup>2</sup> = 0.00]   |
|                                                                             | Any <i>P. vivax</i> parasitaemia              | Pooled IRR, (95%CI); p-value, [I <sup>2</sup> ]  | 0.20 (0.14 - 0.27); <0.0001 [I <sup>2</sup> = 49.64] | 0.17 (0.12 - 0.23); <0.0001 [I <sup>2</sup> = 47.84] | 1.17 (0.92 - 1.48); 0.2102 [I <sup>2</sup> = 0.00]   |
|                                                                             | Symptomatic <i>P. falciparum</i> parasitaemia | Pooled IRR, (95%CI); p-value, [I <sup>2</sup> ]  | 1.12 (0.70 - 1.81); 0.6386 [I <sup>2</sup> = 0.00]   | 0.92 (0.56 - 1.54); 0.7621 [I <sup>2</sup> = 0.00]   | 1.28 (0.87 - 1.90); 0.2126 [I <sup>2</sup> = 0.00]   |
|                                                                             | Any <i>P. falciparum</i> parasitaemia         | Pooled IRR, (95%CI); p-value, [I <sup>2</sup> ]  | 1.06 (0.70 - 1.62); 0.7768 [I <sup>2</sup> = 0.00]   | 0.88 (0.56 - 1.37); 0.5645 [I <sup>2</sup> = 0.00]   | 1.24 (0.87 - 1.76); 0.2309 [I <sup>2</sup> = 0.00]   |
| <b>Excluding the influence of post treatment prophylaxis<sup>4</sup></b>    |                                               |                                                  |                                                      |                                                      |                                                      |
| <b>Time point</b>                                                           | <b>Outcome</b>                                | <b>Measure of association</b>                    |                                                      |                                                      |                                                      |
| <b>12 months</b>                                                            | Symptomatic <i>P. vivax</i> parasitaemia      | Pooled IRD*, (95%CI); p-value, [I <sup>2</sup> ] |                                                      |                                                      | -0.01 (-0.06 - 0.04); 0.7250 [I <sup>2</sup> = 0.00] |
|                                                                             |                                               | Pooled IRR, (95%CI); p-value, [I <sup>2</sup> ]  | 0.18 (0.12 - 0.28); <0.0001 [I <sup>2</sup> = 48.36] | 0.17 (0.11 - 0.26); <0.0001 [I <sup>2</sup> = 51.14] | 1.07 (0.78 - 1.46); 0.6807 [I <sup>2</sup> = 0.00]   |
|                                                                             | Any <i>P. vivax</i> parasitaemia              | Pooled IRR, (95%CI); p-value, [I <sup>2</sup> ]  | 0.17 (0.11 - 0.26); <0.0001 [I <sup>2</sup> = 57.05] | 0.16 (0.10 - 0.24); <0.0001 [I <sup>2</sup> = 59.23] | 1.07 (0.79 - 1.44); 0.6772 [I <sup>2</sup> = 0.00]   |

|                                               |                                                 |                                                       |                                                       |                                                       |
|-----------------------------------------------|-------------------------------------------------|-------------------------------------------------------|-------------------------------------------------------|-------------------------------------------------------|
| Symptomatic <i>P. falciparum</i> parasitaemia | Pooled IRR, (95%CI); p-value, [I <sup>2</sup> ] | 1.10 (0.62 - 1.96); 0.7495<br>[I <sup>2</sup> = 0.00] | 0.81 (0.45 - 1.48); 0.5017<br>[I <sup>2</sup> = 0.00] | 1.36 (0.85 - 2.18);<br>0.1986 [I <sup>2</sup> = 0.00] |
| Any <i>P. falciparum</i> parasitaemia         | Pooled IRR, (95%CI); p-value, [I <sup>2</sup> ] | 1.23 (0.70 - 2.17); 0.4686<br>[I <sup>2</sup> = 0.00] | 1.01 (0.57 - 1.79); 0.9661<br>[I <sup>2</sup> = 0.00] | 1.22 (0.79 - 1.89);<br>0.3684 [I <sup>2</sup> = 0.00] |
|                                               |                                                 |                                                       |                                                       |                                                       |

\* Non-inferiority analysis

[1] All sites except the sites in Vietnam provided the same treatment as originally randomized for up to 4 repeated episodes of *P. vivax* during follow up. The sites in Vietnam only provided the same treatment until the 3rd episode and thereafter treated patients with open primaquine for the subsequent episodes. This sensitivity analysis excludes the sites in Vietnam to accommodate for this difference in procedures.

[2] All sites except the sites in Indonesia used CQ as schizontocidal treatment, the Indonesian sites used DHAP, therefore this sensitivity analysis excludes the sites in Indonesia to accommodate for this difference in schizontocidal treatment regimen. This sensitivity analysis wasn't planned for a priori in the Statistical Analysis Plan, but added post hoc as it was perceived to be important additional information.

[3] All sites except the sites in Vietnam provided the same treatment as originally randomised for up to 4 repeated episodes of *P. vivax* during follow up. The sites in Vietnam only provided the same treatment until the 3rd episode and thereafter treated patients with open primaquine for the subsequent episodes. This sensitivity analysis includes all sites but censors all patients at the time point of the third episode in all countries to accommodate for this difference in procedures.

[4] The effect of post-treatment prophylaxis on the time of observation was assessed using sensitivity analyses by subtracting 28 days from a patient's follow-up time for each antimalarial treatment, irrespective of the drug.

IRR= Incidence rate ratio

IRD= Incidence rate difference

## 18. Site-Specific ITT Hazard Ratios (HR) and Incidence Rate Ratios (IRR)

The hazard ratios (HRs) were estimated using Cox regression (analysis of time to the first event). Incidence rate ratios (IRRs) were estimated using negative binomial regression (analysis of all events). Random effects meta-analysis was used to estimate the I<sup>2</sup> value for heterogeneity across sites. The pooled measure of association is presented across all sites.

### a) PQ7 vs PQ14: Risks and rates for recurrent parasitemia due to symptomatic and any infection due to *P. vivax*

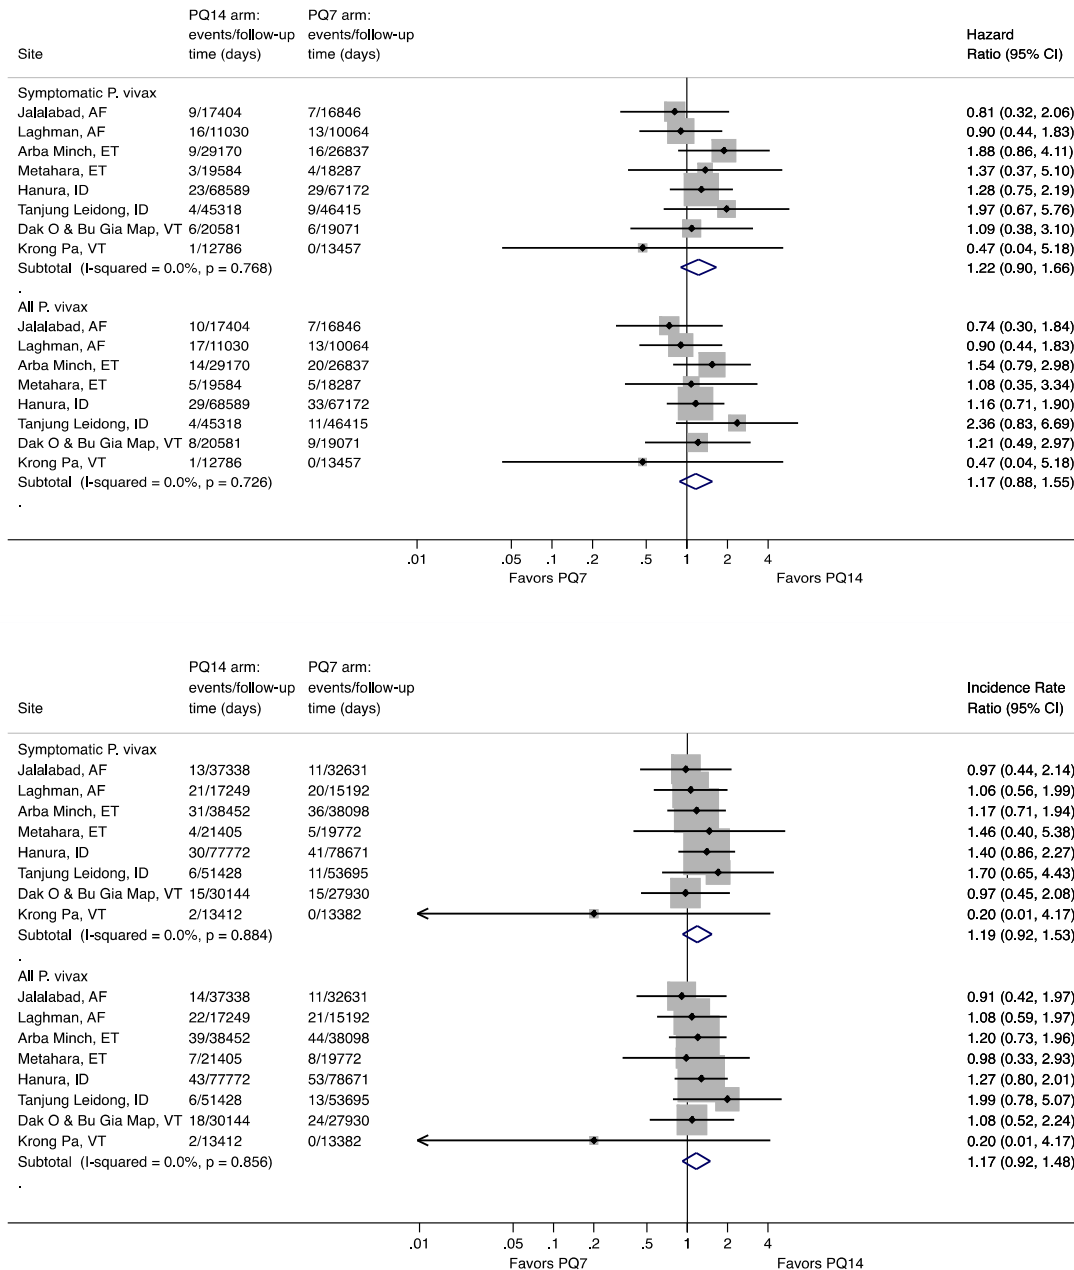

AF = Afghanistan; ET = Ethiopia; ID = Indonesia; VT = Vietnam

**b) PQ7 vs PQ14: Risks and rates for recurrent parasitemia due to symptomatic and any infection due to *P. falciparum***

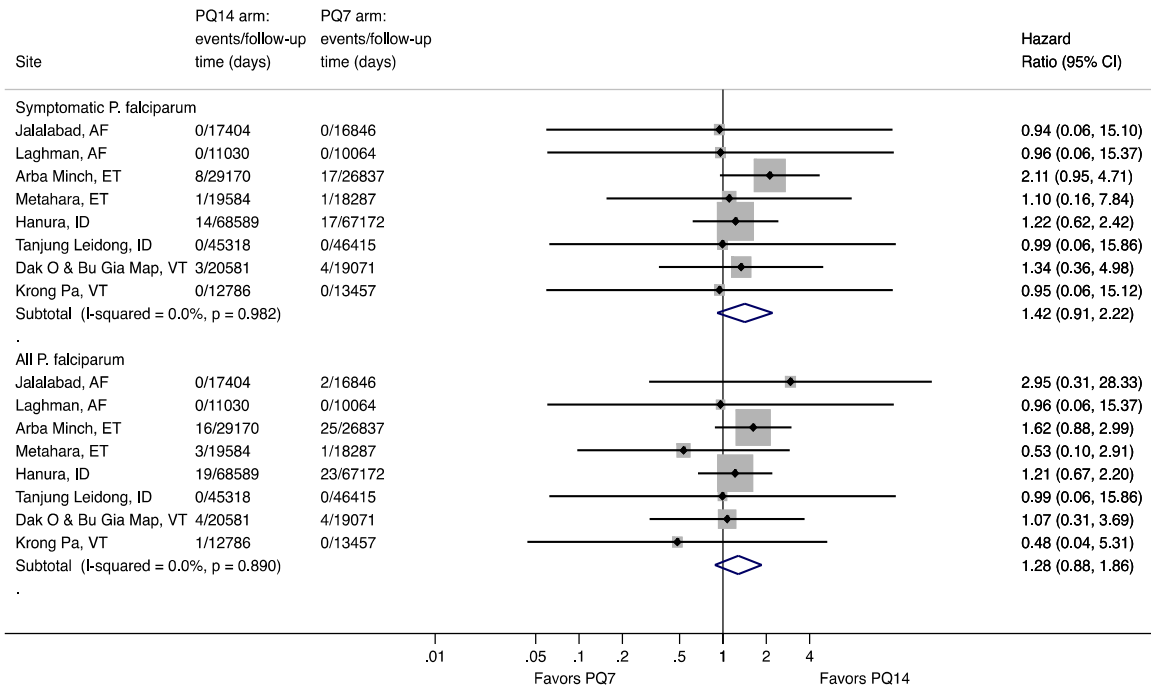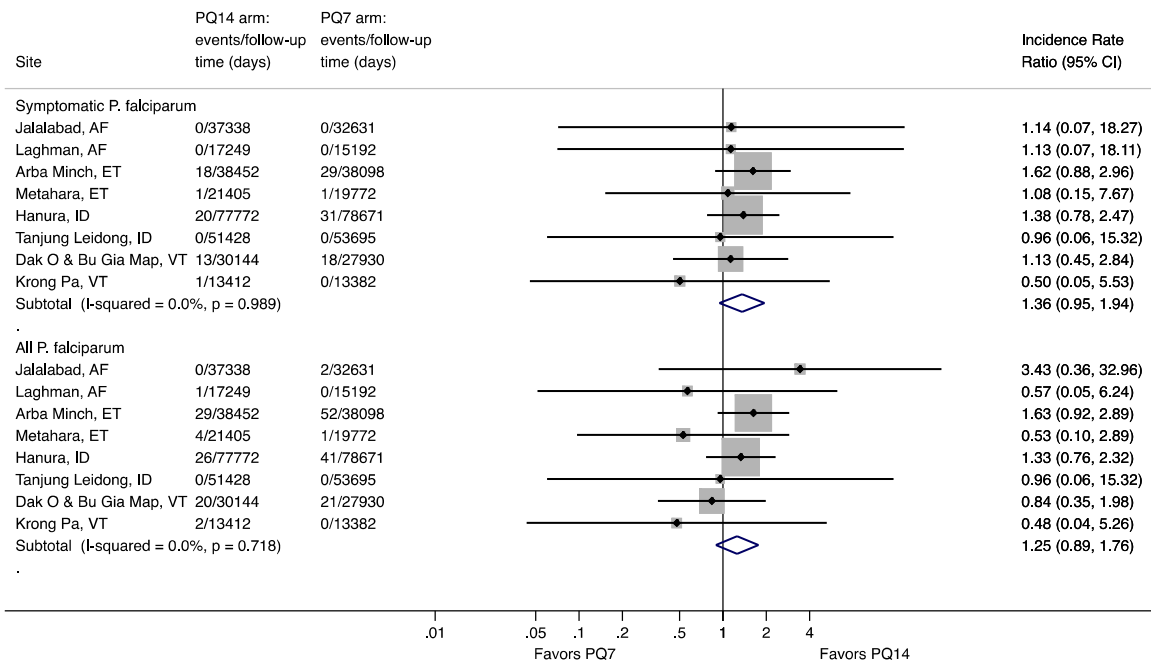

AF = Afghanistan; ET = Ethiopia; ID = Indonesia; VT = Vietnam

**c) PQ7 vs Pq14: Risks and rates for recurrent parasitemia due to symptomatic and any infection due to all *Species***

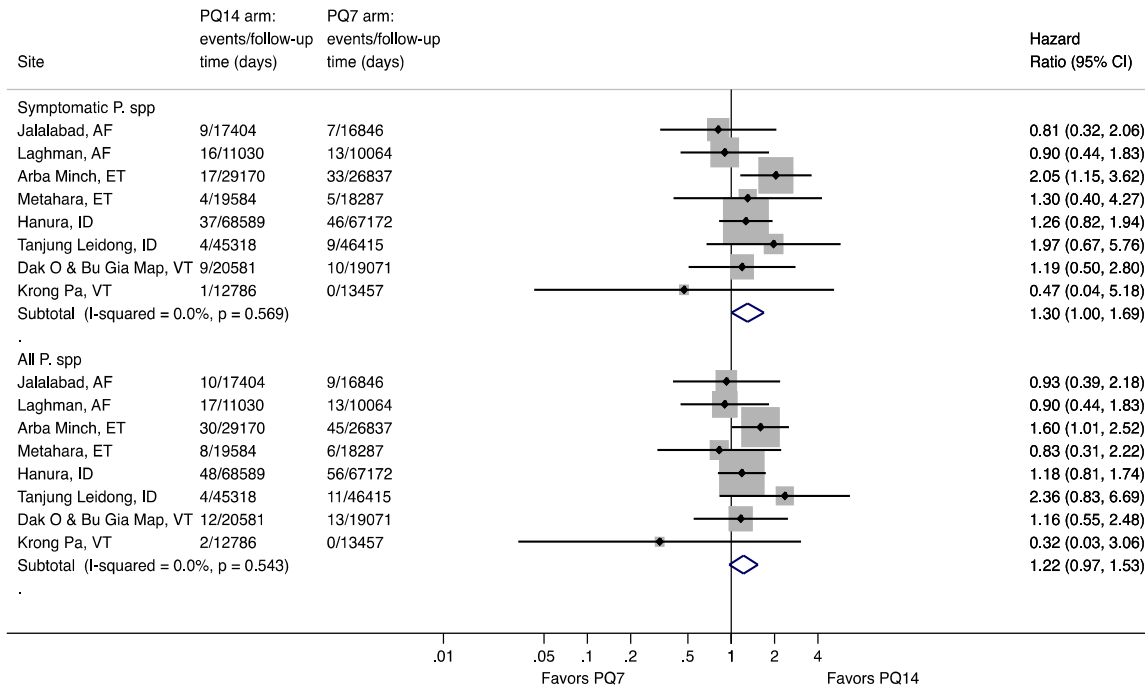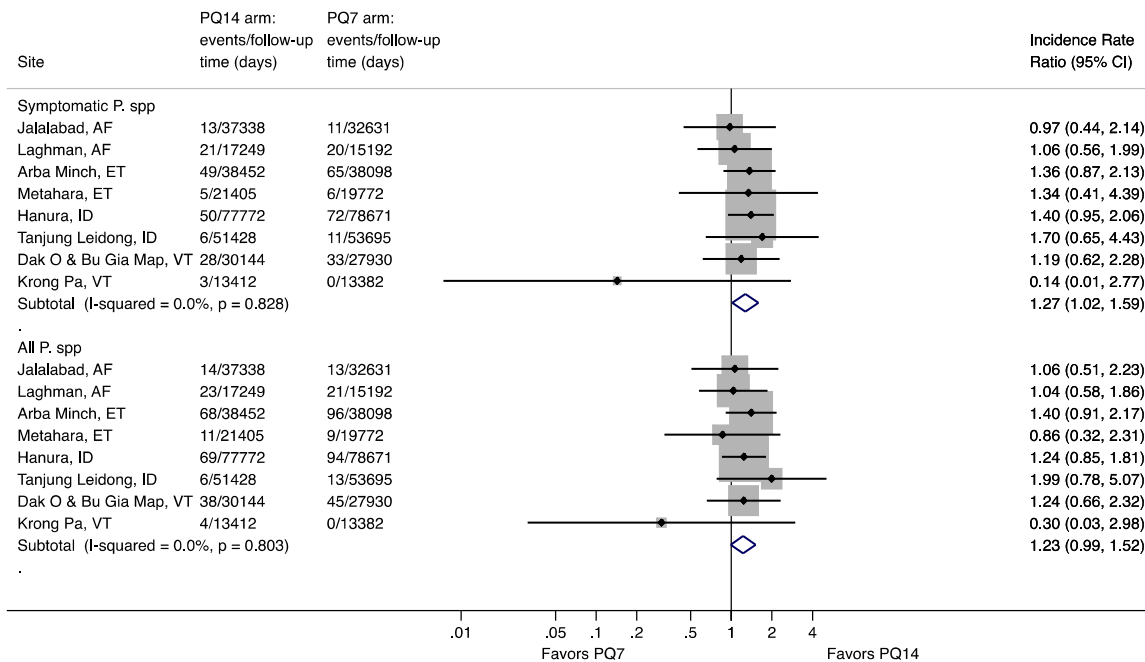

AF = Afghanistan; ET = Ethiopia; ID = Indonesia; VT = Vietnam

**d) PQ7 vs Control: Risks and rates for recurrent parasitemia due to symptomatic and any infection due to *P. vivax***

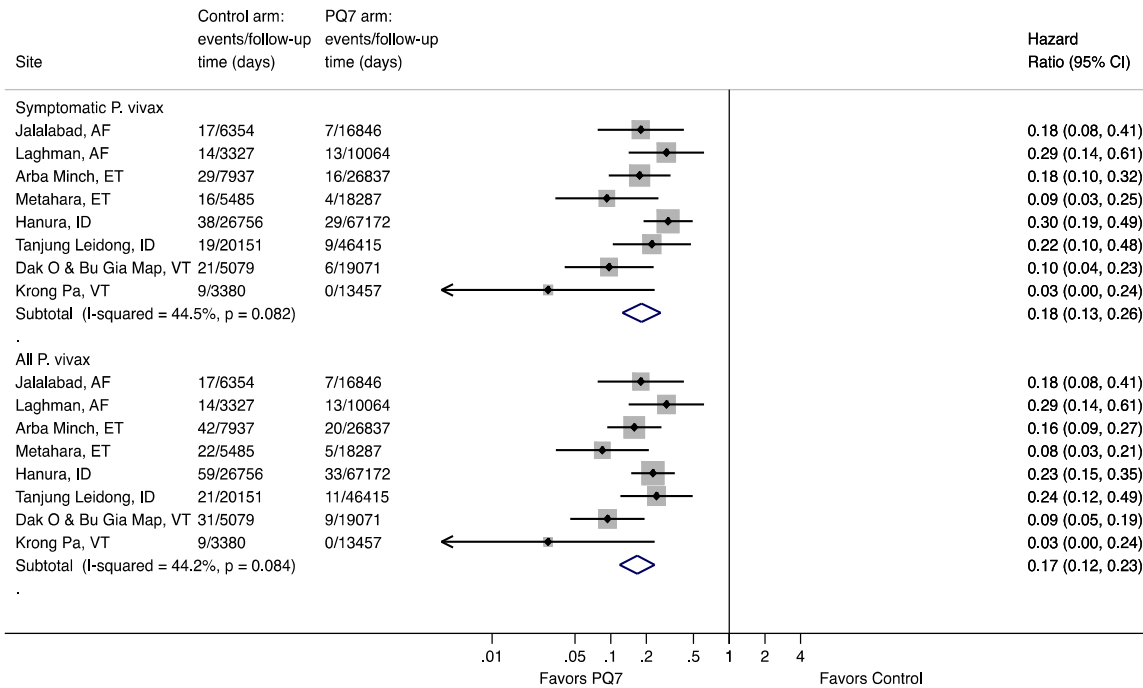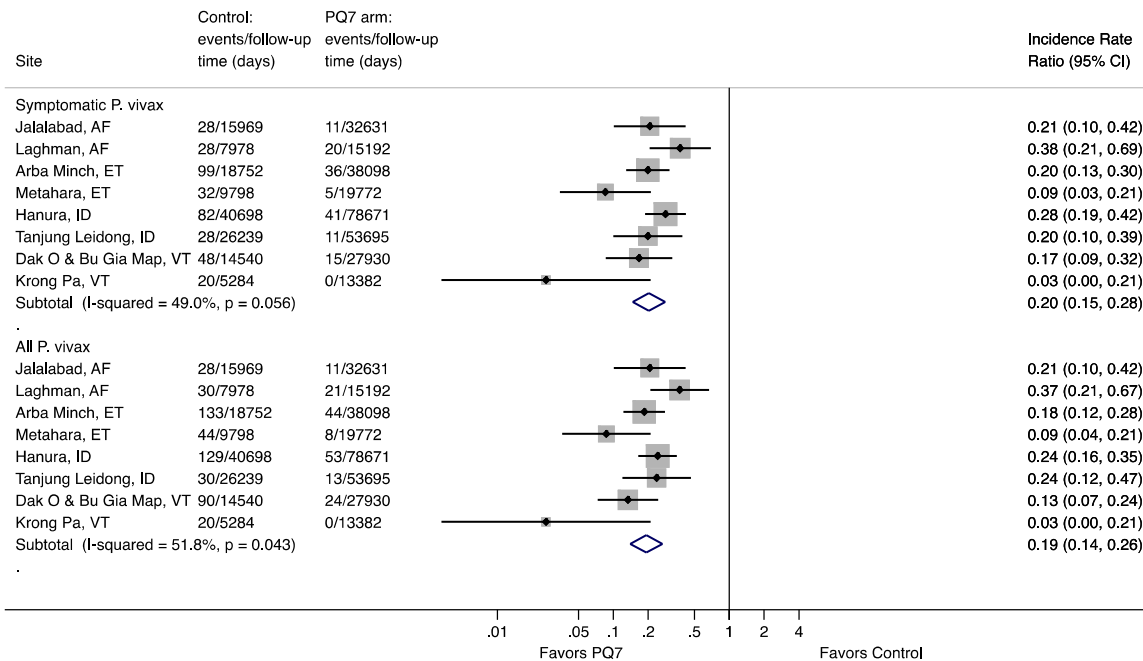

AF = Afghanistan; ET = Ethiopia; ID = Indonesia; VT = Vietnam



**e) PQ7 vs Control: Risks and rates for recurrent parasitemia due to symptomatic and any infection due to *P. falciparum***

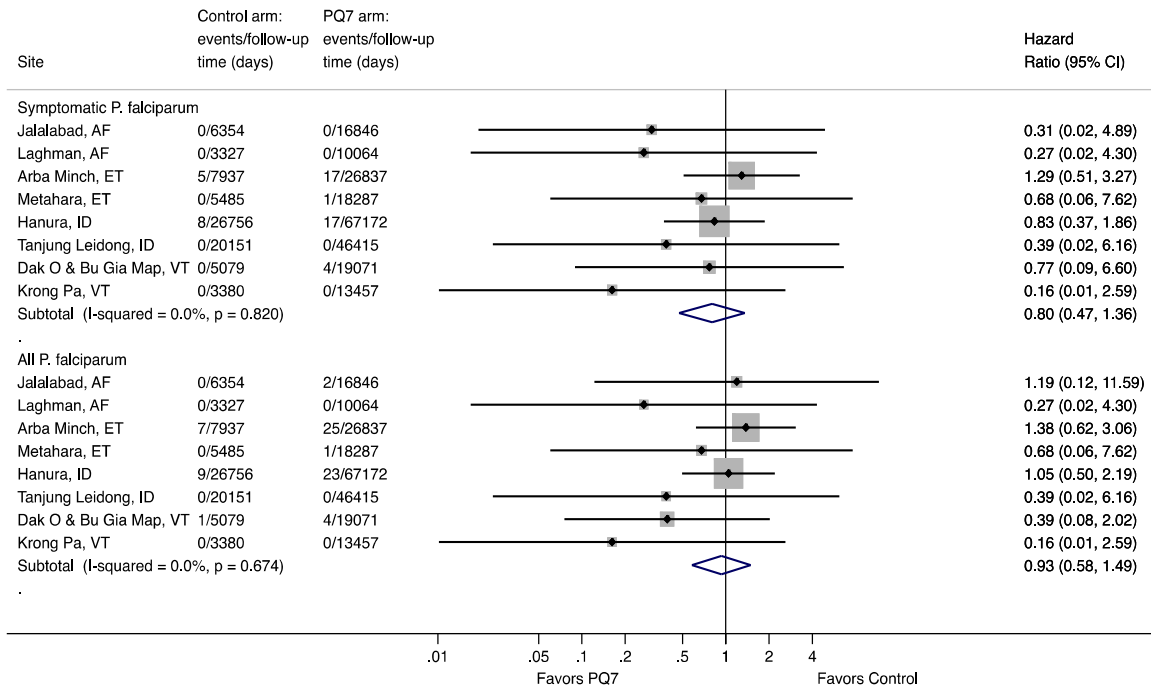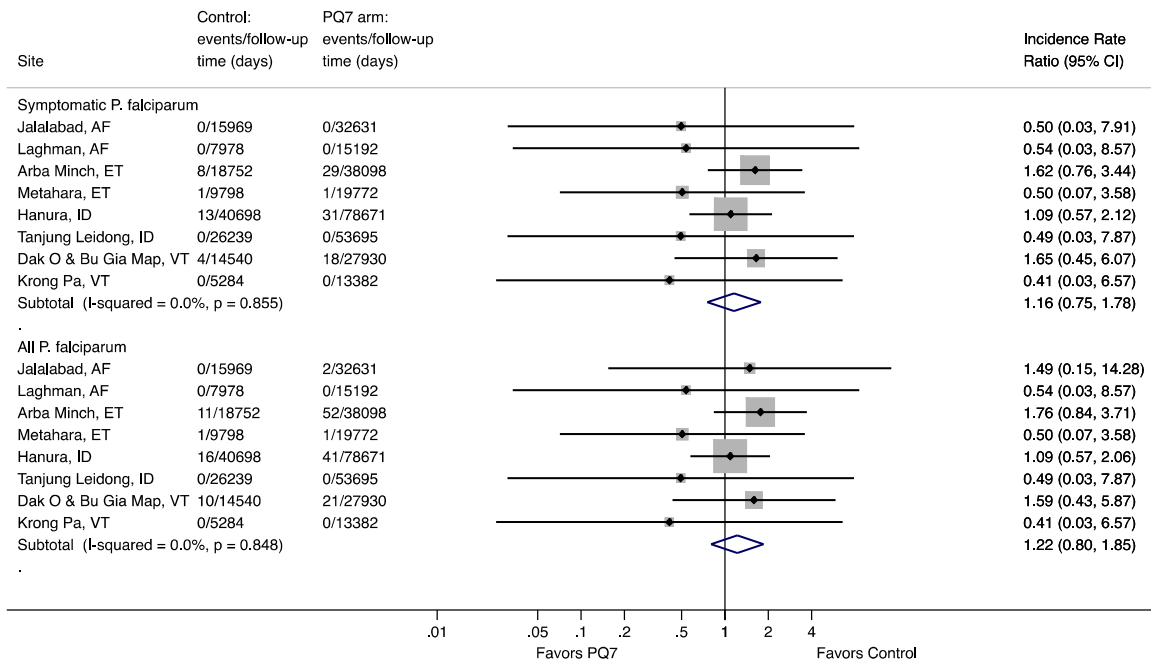

AF = Afghanistan; ET = Ethiopia; ID = Indonesia; VT = Vietnam

**f) PQ7 vs Control: Risks and rates for recurrent parasitemia due to symptomatic and any infection due to all species**

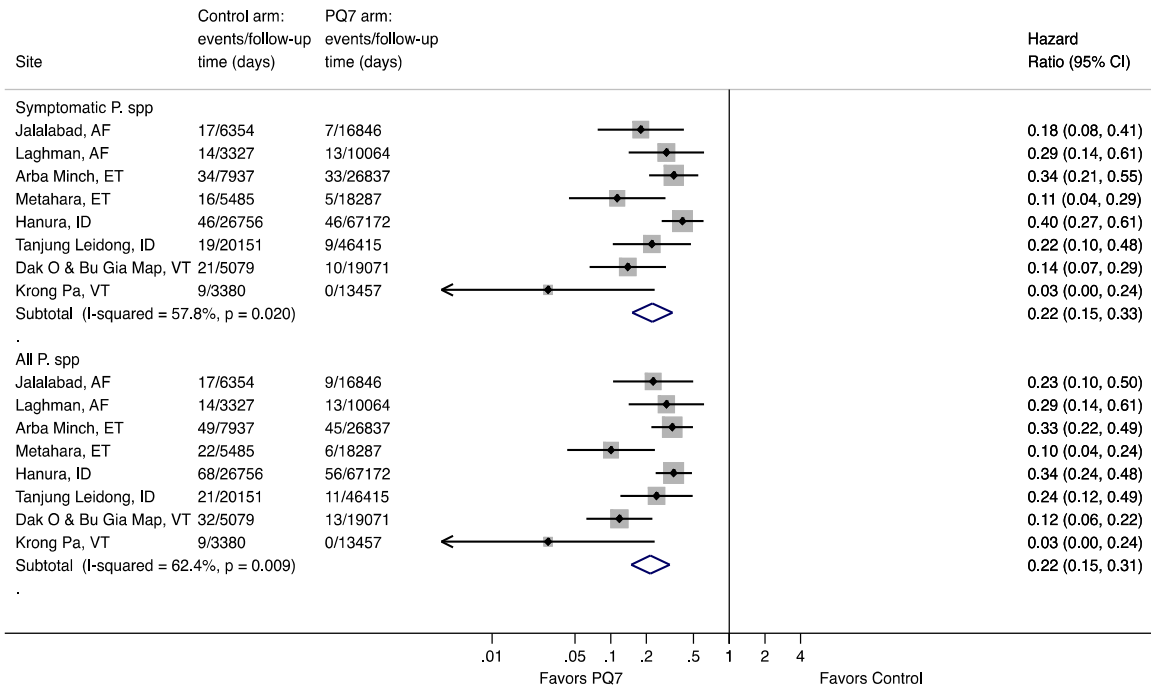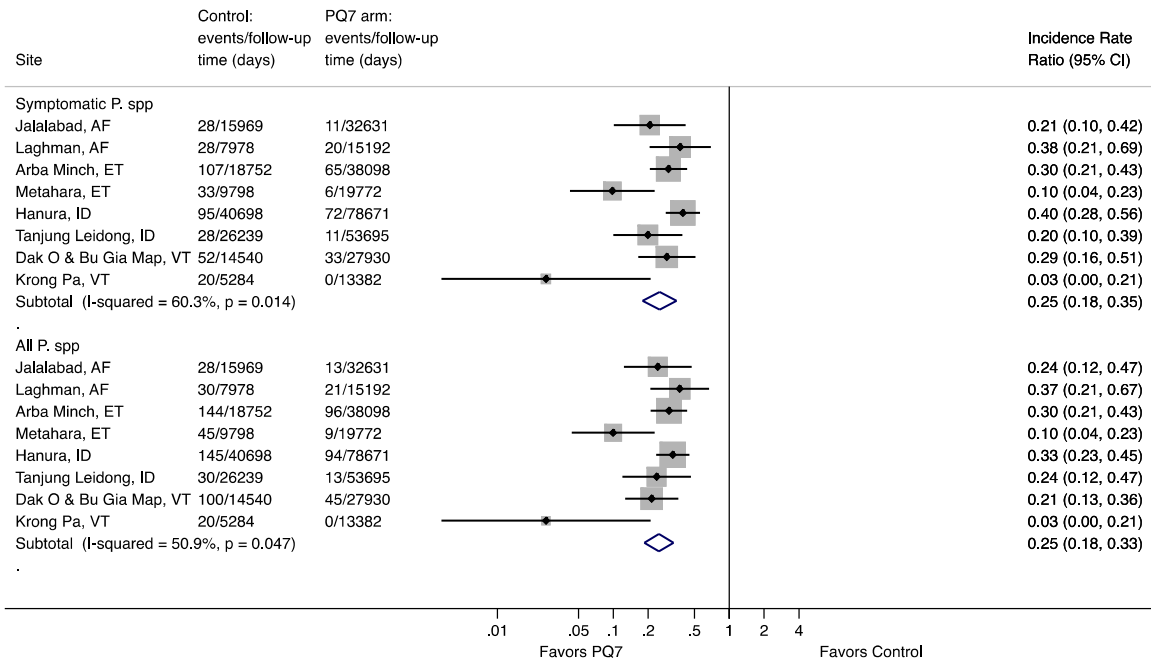

AF = Afghanistan; ET = Ethiopia; ID = Indonesia; VT = Vietnam

### g) PQ14 vs Control: Risks and rates for recurrent parasitemia due to symptomatic and any infection due *P. vivax*

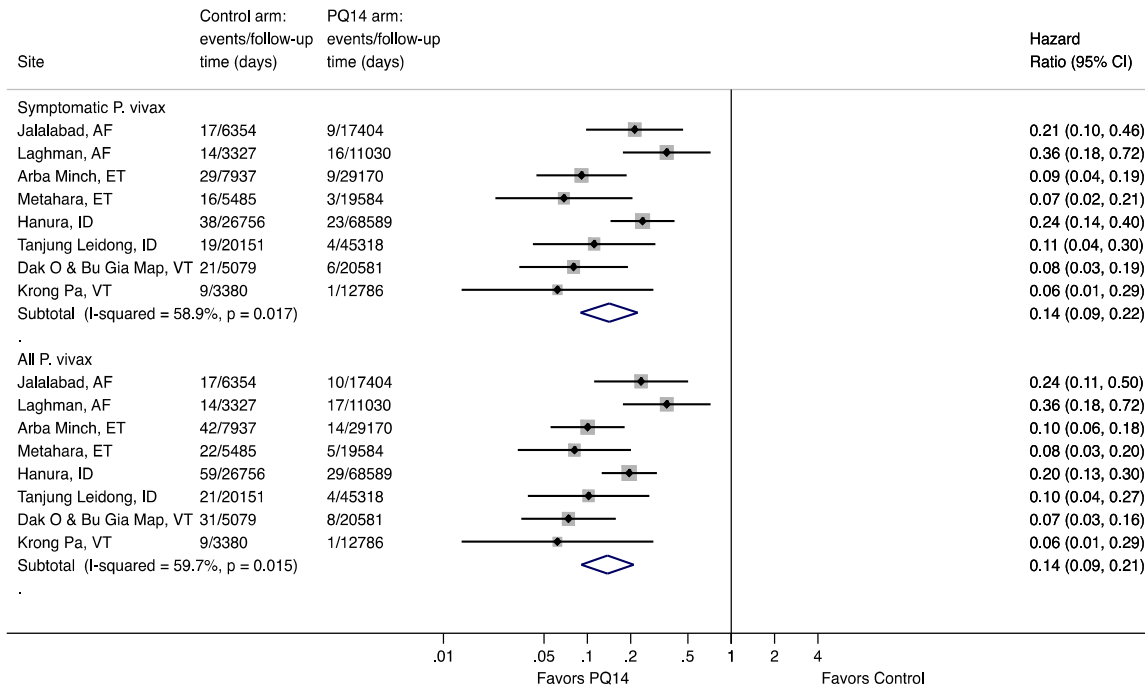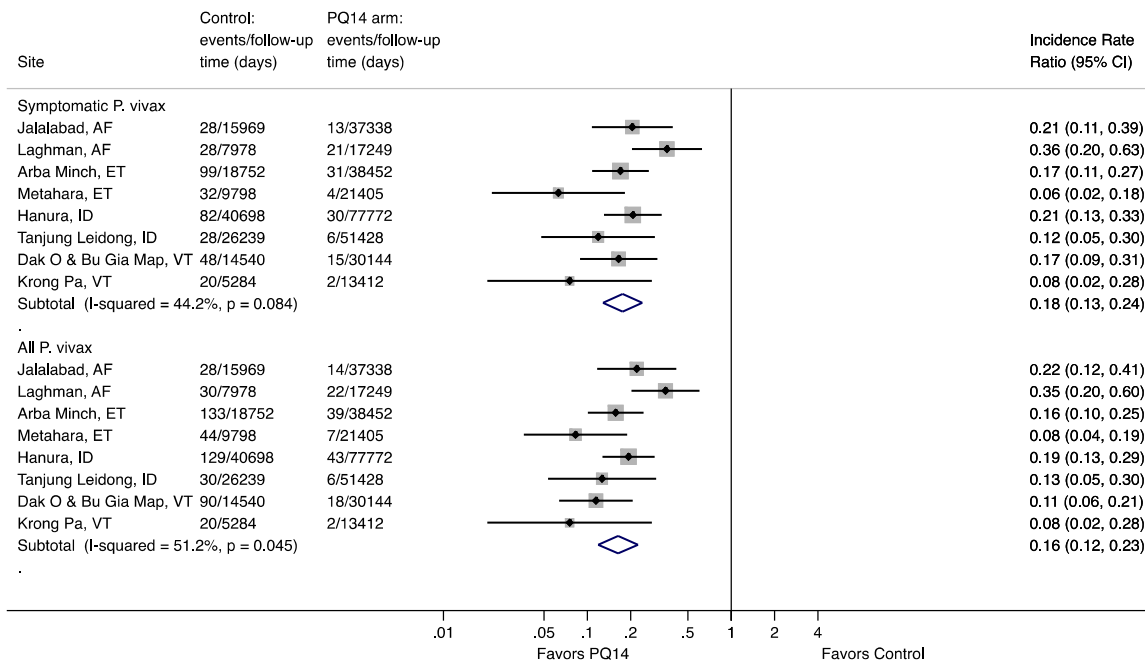

AF = Afghanistan; ET = Ethiopia; ID = Indonesia; VT = Vietnam

### h) PQ14 vs Control: Risks and rates for recurrent parasitemia due to symptomatic and any infection due *P. falciparum*

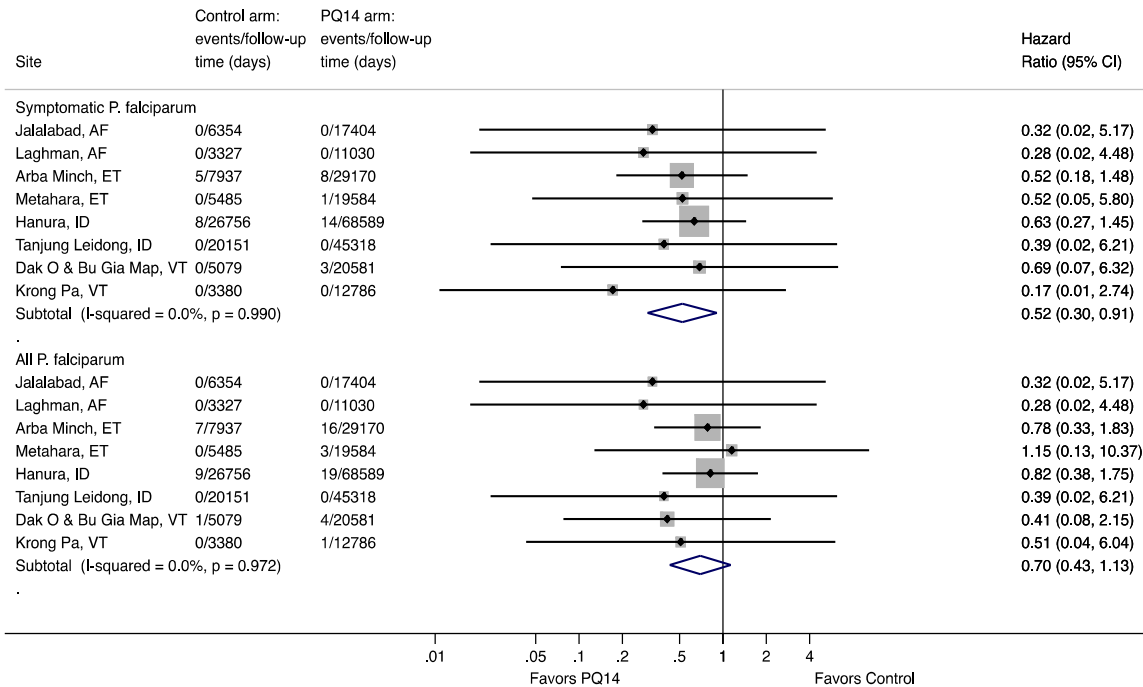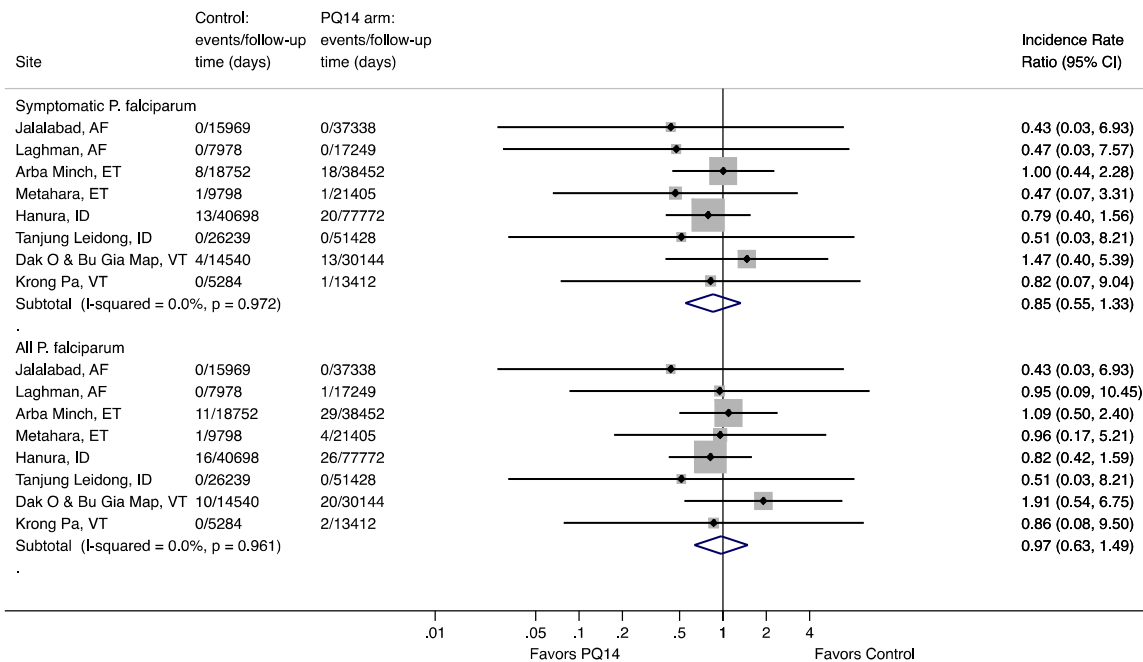

AF = Afghanistan; ET = Ethiopia; ID = Indonesia; VT = Vietnam

**i) PQ14 vs Control: Risks and rates for recurrent parasitemia due to symptomatic and any infection due all species**

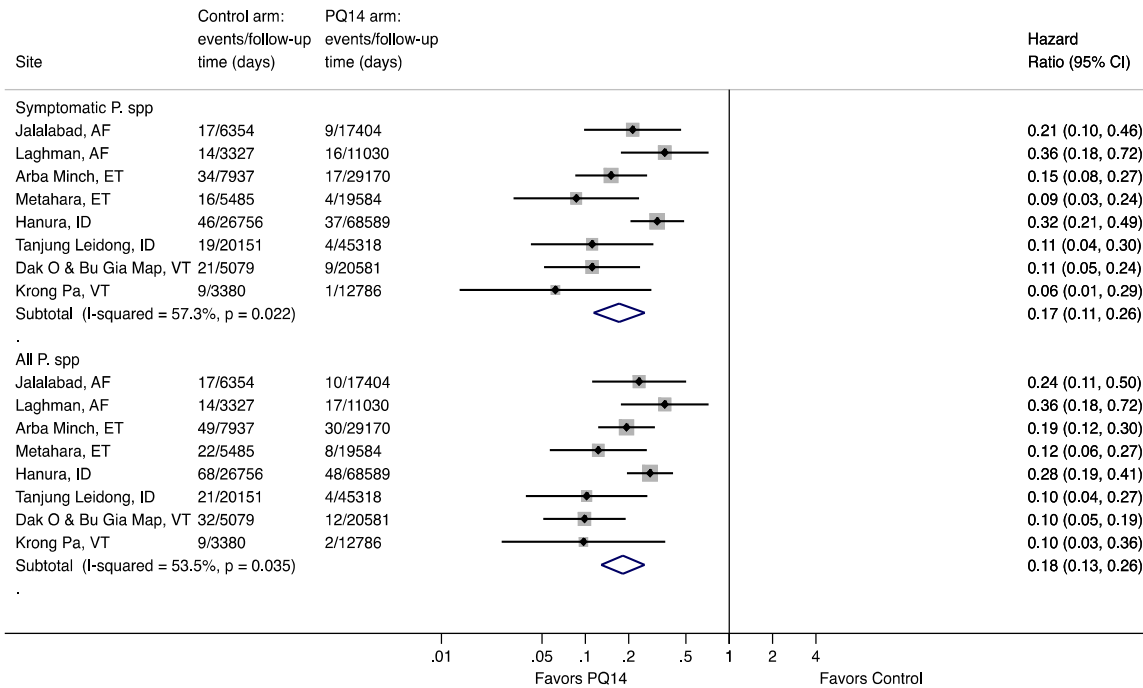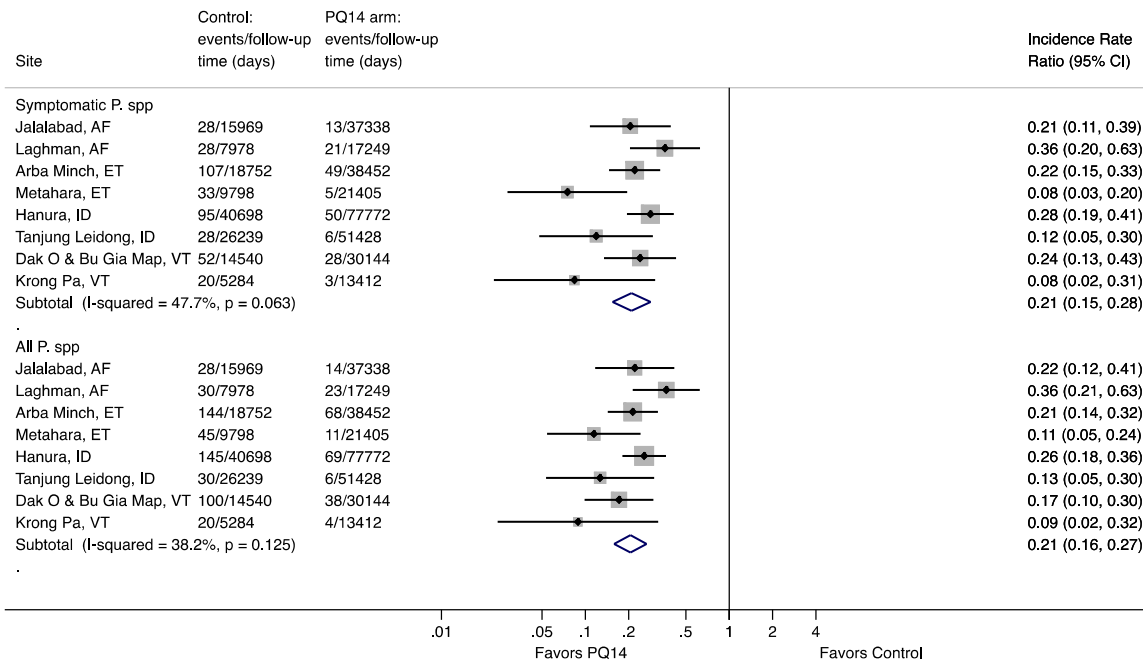

AF = Afghanistan; ET = Ethiopia; ID = Indonesia; VT = Vietnam

## 19. Site-specific Kaplan Meier Curves for Symptomatic *P. vivax* Recurrence

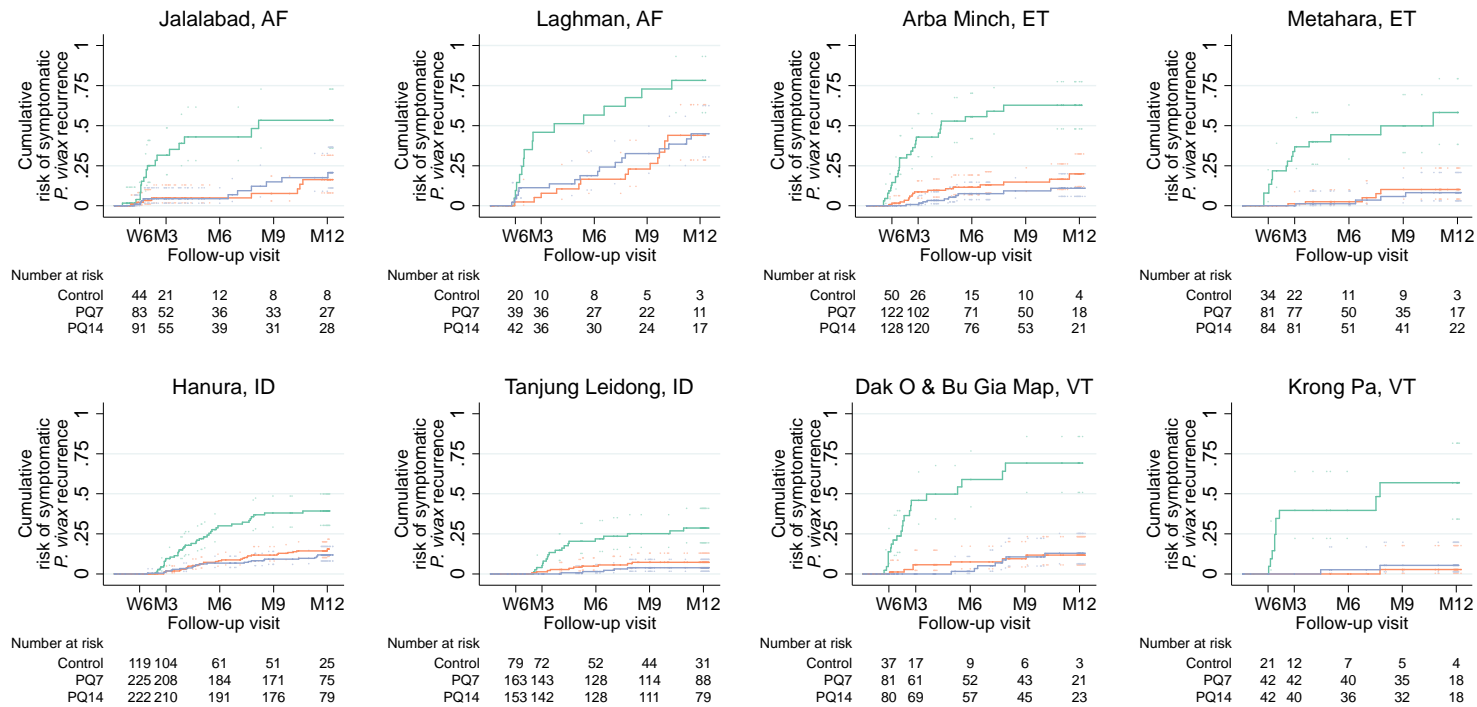

Legend: W=week, M=month

AF = Afghanistan; ET = Ethiopia; ID = Indonesia; VT = Vietnam

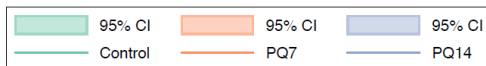

## 20. Details of SAEs

| No                       | Age (yr.) | Sex | Site  | Event/ diagnosis                                          | Criteria for SAE reporting | G6PD status | Day of onset after last treatment | Duration (days) | Relation to study drug | Intensity | Outcome   | Action taken to study drug          |
|--------------------------|-----------|-----|-------|-----------------------------------------------------------|----------------------------|-------------|-----------------------------------|-----------------|------------------------|-----------|-----------|-------------------------------------|
| <b>PQ7 Treatment Arm</b> |           |     |       |                                                           |                            |             |                                   |                 |                        |           |           |                                     |
| 1                        | 9         | F   | ET001 | Severe <i>P. falciparum</i> malaria                       | Hospitalization            | Normal      | 46                                | 1               | Not related            | Severe    | Recovered | NA                                  |
| 2                        | 2         | M   | ET001 | Severe <i>P. falciparum</i> malaria                       | Hospitalization            | Normal      | 221                               | 3               | Not related            | Severe    | Recovered | NA                                  |
| 3                        | 2         | F   | ET001 | Severe <i>P. falciparum</i> malaria                       | Hospitalization            | Normal      | 57                                | 2               | Not related            | Severe    | Recovered | NA                                  |
| 4                        | 11        | F   | ET002 | Persistent vomiting                                       | Hospitalization            | Normal      | 10                                | 4               | Not related            | Severe    | Recovered | Temporarily discontinued for 4 days |
| 5                        | 25        | F   | ET002 | Severe malaria ( <i>P. falciparum</i> + <i>P. vivax</i> ) | Hospitalization            | Normal      | 2                                 | 5               | Not related            | Severe    | Recovered | Continued                           |
| 6                        | 15        | F   | ET002 | Persistent vomiting                                       | Hospitalization            | Normal      | 4                                 | 6               | Probably related       | Severe    | Recovered | Temporarily discontinued for 3 days |
| 7                        | 13        | F   | ET002 | Persistent vomiting                                       | Hospitalization            | Normal      | 2                                 | 4               | Possibly related       | Severe    | Recovered | Temporarily discontinued for 6 days |
| 8                        | 25        | M   | ID004 | Abdominal pain, fever of unexplained origin               | Hospitalization            | Normal      | 6                                 | 3               | Not related            | Severe    | Recovered | Temporarily discontinued for 5 days |
| 9                        | 11        | F   | ID004 | Haemolysis (Hb drop from 11.6 to 6.9 g/dl)                | Hb fall <7g/dL             | Normal      | 3                                 | 3               | Possibly related       | Moderate  | Recovered | Temporarily discontinued for 1 day  |

The IMPROV Study – Supplementary Appendices

|                           |    |   |       |                                                                  |                                       |            |     |   |                    |                  |           |                                                                            |
|---------------------------|----|---|-------|------------------------------------------------------------------|---------------------------------------|------------|-----|---|--------------------|------------------|-----------|----------------------------------------------------------------------------|
| 10                        | 23 | F | ID004 | Fever, abdominal pain, dyspnoea                                  | Hospitalization                       | Normal     | 9   | 5 | Possibly related   | Severe           | Recovered | Temporarily discontinued for 7 days                                        |
| 11                        | 66 | M | ID004 | Sudden unexpected death due to myocardial infarction             | Death                                 | Normal     | 151 | 1 | Not related        | Life-threatening | Fatal     | NA                                                                         |
| 12                        | 11 | F | ID004 | Symptomatic methaemoglobin aemia & bronchopneumonia              | Hospitalization                       | Normal     | 10  | 7 | Definitely related | Severe           | Recovered | Temporarily discontinued for 2 days. 4 days later permanently discontinued |
| 13                        | 16 | F | ID004 | Acute appendicitis                                               | Hospitalization                       | Normal     | 170 | 7 | Not related        | Moderate         | Recovered | NA                                                                         |
| 14                        | 13 | M | ID004 | Unilateral periorbital ecchymosis                                | Hospitalization                       | Normal     | 54  | 1 | Not related        | Moderate         | Recovered | NA                                                                         |
| 15                        | 19 | F | ID004 | Acute haemolysis (Hb drop from 13.7 to 9.5 g/dl)                 | Other important medical event         | Normal     | 3   | 1 | Definitely related | Severe           | Recovered | Permanently discontinued                                                   |
| 16                        | 9  | F | ID005 | Epigastric pain                                                  | Hospitalization                       | Normal     | 4   | 1 | Possibly related   | Moderate         | Recovered | Temporarily discontinued for 3 days                                        |
| 17                        | 7  | F | VN001 | Diarrhoea                                                        | Hospitalization                       | Normal     | 7   | 4 | Definitely related | Moderate         | Recovered | Continued                                                                  |
| 18                        | 20 | M | VN001 | Acute haemolysis (Hb drop from 15.3 to 6.4 g/dl)                 | Hospitalization and blood transfusion | Deficient* | 5   | 6 | Definitely related | Moderate         | Recovered | Permanently discontinued                                                   |
| <b>PQ14 Treatment Arm</b> |    |   |       |                                                                  |                                       |            |     |   |                    |                  |           |                                                                            |
| 19                        | 3  | M | ET002 | Haemolysis (Hb drop from 10.2 to 6.8/dl)                         | Other important medical event         | Normal     | 3   | 3 | Probably related   | Severe           | Recovered | Permanently Discontinued                                                   |
| 20                        | 11 | M | ET002 | Acute exacerbation of bronchial asthma precipitated by pneumonia | Hospitalization                       | Normal     | 91  | 5 | Not related        | Severe           | Recovered | NA                                                                         |



The IMPROV Study – Supplementary Appendices

|                                                     |    |   |       |                                           |                  |        |     |    |             |                       |           |                                     |
|-----------------------------------------------------|----|---|-------|-------------------------------------------|------------------|--------|-----|----|-------------|-----------------------|-----------|-------------------------------------|
| 21                                                  | 13 | M | ID004 | Complicated puncture wound                | Hospitalization  | Normal | 129 | 5  | Not related | Pot. life-threatening | Recovered | NA                                  |
| 22                                                  | 46 | M | ID004 | Generalised peritonitis                   | Hospitalization  | Normal | 92  | 13 | Not related | Severe                | Recovered | NA                                  |
| 23                                                  | 19 | M | VN001 | Undifferentiated carcinoma in nasopharynx | Life-threatening | Normal | 147 |    | Not related | Moderate              | Improving | NA                                  |
| <b>Control Arm</b>                                  |    |   |       |                                           |                  |        |     |    |             |                       |           |                                     |
| 24                                                  | 19 | F | ET001 | Soft tissue injury (car accident)         | Hospitalization  | Normal | 5   | 3  | Not related | Moderate              | Recovered | Cont.                               |
| 25                                                  | 7  | F | ID004 | Bacterial enteritis                       | Hospitalization  | Normal | 12  | 4  | Not related | Moderate              | Recovered | Temporarily discontinued for 9 days |
| 26                                                  | 9  | M | ID004 | Dengue fever                              | Hospitalization  | Normal | 4   | 3  | Not related | Moderate              | Recovered | Temporarily discontinued for 3 days |
| 27                                                  | 22 | M | VN001 | Severe <i>P. falciparum</i> malaria       | Hospitalization  | Normal | 14  | 3  | Not related | Severe                | Recovered | NA                                  |
| *Patient was wrongly enrolled into G6PD normal arms |    |   |       |                                           |                  |        |     |    |             |                       |           |                                     |

## 21. Site Specific Adverse Events

|             | Site                | Outcome measure                                      | Control       | PQ7           | PQ14     |
|-------------|---------------------|------------------------------------------------------|---------------|---------------|----------|
| Afghanistan | AF001<br>Jalalabad  | Number enrolled                                      | 60            | 125           | 126      |
|             |                     | SAE PQ related - All severities                      | 0 (0.0%)      | 0 (0.0%)      | 0 (0.0%) |
|             |                     | SAE PQ unrelated - All severities                    | 0 (0.0%)      | 0 (0.0%)      | 0 (0.0%) |
|             |                     | AE - Grade 3 & 4                                     | 0 (0.0%)      | 1 (0.8%)      | 0 (0.0%) |
|             |                     | Event duration (days), median (IQR)                  |               | 5.0 (5.0-5.0) |          |
|             |                     | Treatment discontinued N (%)                         | 0 (0.0%)      | 0 (0.0%)      | 0 (0.0%) |
|             |                     | Vomited within 1hr of a study dose [initial episode] | 1 (1.7%)      | 1 (0.8%)      | 1 (0.8%) |
|             | AF008<br>Laghman    | Number enrolled                                      | 23            | 48            | 49       |
|             |                     | SAE PQ related - All severities                      | 0 (0.0%)      | 0 (0.0%)      | 0 (0.0%) |
|             |                     | SAE PQ unrelated - All severities                    | 0 (0.0%)      | 0 (0.0%)      | 0 (0.0%) |
|             |                     | AE - Grade 3 & 4                                     | 0 (0.0%)      | 0 (0.0%)      | 0 (0.0%) |
|             |                     | Event duration (days), median (IQR)                  |               |               |          |
|             |                     | Treatment discontinued N (%)                         | 0 (0.0%)      | 0 (0.0%)      | 0 (0.0%) |
|             |                     | Vomited within 1hr of a study dose [initial episode] | 0 (0.0%)      | 0 (0.0%)      | 0 (0.0%) |
| Ethiopia    | ET001<br>Arba Minch | Number enrolled                                      | 74            | 149           | 148      |
|             |                     | SAE PQ related - All severities                      | 0 (0.0%)      | 0 (0.0%)      | 0 (0.0%) |
|             |                     | SAE PQ unrelated - All severities                    | 1 (1.4%)      | 3 (2.0%)      | 0 (0.0%) |
|             |                     | AE - Grade 3 & 4                                     | 0 (0.0%)      | 0 (0.0%)      | 0 (0.0%) |
|             |                     | Event duration (days), median (IQR)                  | 3.0 (3.0-3.0) |               |          |
|             |                     | Treatment discontinued N (%)                         | 0 (0.0%)      | 0 (0.0%)      | 0 (0.0%) |

|                  |                                      |                                                      |                  |                  |                     |
|------------------|--------------------------------------|------------------------------------------------------|------------------|------------------|---------------------|
|                  |                                      | Vomited within 1hr of a study dose [initial episode] | 4 (5.4%)         | 2 (1.3%)         | 4 (2.7%)            |
|                  | <b>ET002<br/>Metahara</b>            | Number enrolled                                      | 40               | 85               | 84                  |
|                  |                                      | SAE PQ related - All severities                      | 0 (0.0%)         | 2 (2.4%)         | 1 (1.2%)            |
|                  |                                      | SAE PQ unrelated - All severities                    | 0 (0.0%)         | 2 (2.4%)         | 1 (1.2%)            |
|                  |                                      | AE - Grade 3 & 4                                     | 0 (0.0%)         | 1 (1.2%)         | 0 (0.0%)            |
|                  |                                      | Event duration (days), median (IQR)                  |                  | 4.0<br>(3.0-5.0) | 32.0<br>(32.0-32.0) |
|                  |                                      | Treatment discontinued N (%)                         | 0 (0.0%)         | 4 (4.7%)         | 1 (1.2%)            |
|                  |                                      | Vomited within 1hr of a study dose [initial episode] | 0 (0.0%)         | 1 (1.2%)         | 0 (0.0%)            |
|                  |                                      |                                                      |                  |                  |                     |
| <b>Indonesia</b> | <b>ID004<br/>Hanura</b>              | Number enrolled                                      | 118              | 229              | 228                 |
|                  |                                      | SAE PQ related - All severities                      | 0 (0.0%)         | 4 (1.7%)         | 0 (0.0%)            |
|                  |                                      | SAE PQ unrelated - All severities                    | 2 (1.6%)         | 4 (1.7%)         | 2 (0.8%)            |
|                  |                                      | AE - Grade 3 & 4                                     | 0 (0.0%)         | 4 (1.7%)         | 1 (0.4%)            |
|                  |                                      | Event duration (days), median (IQR)                  | 3.0<br>(3.0-3.0) | 5.0<br>(3.0-6.0) | 1.0<br>(1.0-1.0)    |
|                  |                                      | Treatment discontinued N (%)                         | 2 (1.7%)         | 7 (3.1%)         | 2 (0.9%)            |
|                  |                                      | Vomited within 1hr of a study dose [initial episode] | 5 (4.2%)         | 11 (4.8%)        | 10 (4.4%)           |
|                  |                                      |                                                      |                  |                  |                     |
|                  | <b>ID005<br/>Tanjung<br/>Leidong</b> | Number enrolled                                      | 85               | 171              | 169                 |
|                  |                                      | SAE PQ related - All severities                      | 0 (0.0%)         | 1 (0.6%)         | 0 (0.0%)            |
|                  |                                      | SAE PQ unrelated - All severities                    | 0 (0.0%)         | 0 (0.0%)         | 0 (0.0%)            |
|                  |                                      | AE - Grade 3 & 4                                     | 0 (0.0%)         | 0 (0.0%)         | 0 (0.0%)            |
|                  |                                      | Event duration (days), median (IQR)                  |                  | 1.0<br>(1.0-1.0) |                     |
|                  |                                      | Treatment discontinued N (%)                         | 1 (1.2%)         | 1 (0.6%)         | 2 (1.2%)            |
|                  |                                      | Vomited within 1hr of a study dose [initial episode] | 1 (1.2%)         | 4 (2.3%)         | 3 (1.8%)            |
|                  |                                      |                                                      |                  |                  |                     |
| <b>Vietnam</b>   | <b>VN001</b>                         | Number enrolled                                      | 43               | 87               | 89                  |

|                                                      |                               |                                                      |          |               |          |
|------------------------------------------------------|-------------------------------|------------------------------------------------------|----------|---------------|----------|
|                                                      | <b>Dak O &amp; Bu Gia Map</b> | SAE PQ related - All severities                      | 0 (0.0%) | 2 (2.3%)      | 0 (0.0%) |
|                                                      |                               | SAE PQ unrelated - All severities                    | 1 (2.3%) | 0 (0.0%)      | 1 (1.1%) |
|                                                      |                               | AE - Grade 3 & 4                                     | 0 (0.0%) | 1 (1.1%)      | 0 (0.0%) |
|                                                      |                               | Event duration (days), median (IQR)                  |          | 4.0 (1.0-6.0) |          |
|                                                      |                               | Treatment discontinued N (%)                         | 1 (2.3%) | 6 (6.9%)      | 3 (3.4%) |
|                                                      |                               | Vomited within 1hr of a study dose [initial episode] | 0 (0.0%) | 2 (2.3%)      | 1 (1.1%) |
|                                                      |                               |                                                      |          |               |          |
|                                                      | <b>VN002 Krong Pa</b>         | Number enrolled                                      | 21       | 41            | 44       |
|                                                      |                               | SAE PQ related - All severities                      | 0 (0.0%) | 0 (0.0%)      | 0 (0.0%) |
|                                                      |                               | SAE PQ unrelated - All severities                    | 0 (0.0%) | 0 (0.0%)      | 0 (0.0%) |
|                                                      |                               | AE - Grade 3 & 4                                     | 0 (0.0%) | 0 (0.0%)      | 0 (0.0%) |
|                                                      |                               | Event duration (days), median (IQR)                  |          |               |          |
|                                                      |                               | Treatment discontinued N (%)                         | 0 (0.0%) | 1 (2.4%)      | 1 (2.3%) |
| Vomited within 1hr of a study dose [initial episode] |                               | 0 (0.0%)                                             | 0 (0.0%) | 1 (2.3%)      |          |

## 22. Details of AEs

| No                        | Age (yr.) | Sex    | Site  | Event/<br>Diagnosis         | Day of onset after last treatment | Duration (days) | Relation to study drug | Grade |
|---------------------------|-----------|--------|-------|-----------------------------|-----------------------------------|-----------------|------------------------|-------|
| <b>PQ7 Treatment Arm</b>  |           |        |       |                             |                                   |                 |                        |       |
| 1                         | 38        | Female | ID004 | Dyspepsia                   | 2                                 | 6               | Possibly related       | 3     |
| 2                         | 4         | Male   | AF001 | Pneumonia                   | 2                                 | 5               | Possibly related       | 3     |
| 3                         | 31        | Male   | VN001 | Vomiting & Watery diarrhoea | 4                                 | 1               | Probably related       | 3     |
| 4                         | 13        | Female | ID004 | Dyspepsia                   | 5                                 | 6               | Probably related       | 3     |
| 5                         | 13        | Female | ID004 | Dyspepsia                   | 5                                 | 4               | Definitely related     | 3     |
| 6                         | 13        | Male   | ID004 | Dyspepsia                   | 5                                 | 6               | Probably related       | 3     |
| 7                         | 15        | Male   | ET002 | Gastritis                   | 8                                 | 2               | Possibly related       | 3     |
| <b>PQ14 Treatment Arm</b> |           |        |       |                             |                                   |                 |                        |       |
| 1                         | 40        | Female | ID004 | Fever & cold symptoms       | 10                                | 1               | Possibly related       | 3     |

## 23. Symptoms Elicited from Daily Questionnaires During Treatment between Days 1 and 3

The proportion of patients reporting each symptom at least once between days 1 and 3

|                    | Site                       | Outcome measure          | Control     | PQ7         | PQ14        |           |
|--------------------|----------------------------|--------------------------|-------------|-------------|-------------|-----------|
| <b>Overall</b>     |                            | Number [1]               | N=461       | N=927       | N=934       |           |
|                    |                            | Vomiting                 | 55 (11.9%)  | 137 (14.7%) | 110 (11.7%) |           |
|                    |                            | Headache                 | 206 (44.4%) | 424 (45.3%) | 417 (44.5%) |           |
|                    |                            | Nausea                   | 144 (31.0%) | 308 (32.9%) | 292 (31.2%) |           |
|                    |                            | Diarrhoea                | 15 (3.2%)   | 40 (4.3%)   | 18 (1.9%)   |           |
|                    |                            | Skin Rash                | 7 (1.5%)    | 12 (1.3%)   | 14 (1.5%)   |           |
|                    |                            | Poor appetite            | 166 (35.8%) | 352 (37.6%) | 347 (37.0%) |           |
|                    |                            | Abdominal Pain           | 119 (25.6%) | 259 (27.7%) | 235 (25.1%) |           |
|                    |                            | Myalgia / Arthralgia     | 112 (24.1%) | 219 (23.4%) | 205 (21.9%) |           |
|                    |                            | Fever                    | 121 (26.1%) | 241 (25.8%) | 260 (27.7%) |           |
|                    |                            | Passing dark urine       | 17 (3.7%)   | 35 (3.7%)   | 38 (4.1%)   |           |
|                    |                            | Dizziness                | 66 (14.2%)  | 137 (14.7%) | 133 (14.2%) |           |
|                    |                            | Shortness of Breath      | 13 (2.8%)   | 19 (2.0%)   | 15 (1.6%)   |           |
|                    |                            | Itching                  | 9 (1.9%)    | 16 (1.7%)   | 18 (1.9%)   |           |
|                    | Any GI symptoms [2]        | 224 (48.3%)              | 461 (49.3%) | 456 (48.7%) |             |           |
| <b>Afghanistan</b> | <b>AF001<br/>Jalalabad</b> | Number [1]               | N=59        | N=124       | N=125       |           |
|                    |                            | Vomiting                 | 1 (1.7%)    | 5 (4.0%)    | 6 (4.8%)    |           |
|                    |                            | Headache                 | 13 (22.0%)  | 18 (14.5%)  | 28 (22.4%)  |           |
|                    |                            | Nausea                   | 4 (6.8%)    | 11 (8.9%)   | 10 (8.0%)   |           |
|                    |                            | Diarrhoea                | 0 (0.0%)    | 5 (4.0%)    | 3 (2.4%)    |           |
|                    |                            | Skin Rash                | 0 (0.0%)    | 0 (0.0%)    | 0 (0.0%)    |           |
|                    |                            | Poor appetite            | 3 (5.1%)    | 13 (10.5%)  | 14 (11.2%)  |           |
|                    |                            | Abdominal Pain           | 3 (5.1%)    | 11 (8.9%)   | 7 (5.6%)    |           |
|                    |                            | Myalgia / Arthralgia     | 8 (13.6%)   | 9 (7.3%)    | 19 (15.2%)  |           |
|                    |                            | Fever                    | 6 (10.2%)   | 13 (10.5%)  | 16 (12.8%)  |           |
|                    |                            | Passing dark urine       | 0 (0.0%)    | 4 (3.2%)    | 2 (1.6%)    |           |
|                    |                            | Dizziness                | 4 (6.8%)    | 13 (10.5%)  | 8 (6.4%)    |           |
|                    |                            | Shortness of Breath      | 0 (0.0%)    | 1 (0.8%)    | 0 (0.0%)    |           |
|                    |                            | Itching                  | 1 (1.7%)    | 0 (0.0%)    | 2 (1.6%)    |           |
|                    | Any GI symptoms [2]        | 6 (10.2%)                | 23 (18.5%)  | 19 (15.2%)  |             |           |
|                    |                            | <b>AF008<br/>Laghman</b> | Number [1]  | N=23        | N=47        | N=49      |
|                    |                            |                          | Vomiting    | 0 (0.0%)    | 2 (4.3%)    | 1 (2.0%)  |
|                    |                            |                          | Headache    | 1 (4.3%)    | 2 (4.3%)    | 9 (18.4%) |
|                    |                            |                          | Nausea      | 1 (4.3%)    | 3 (6.4%)    | 1 (2.0%)  |
|                    |                            |                          | Diarrhoea   | 0 (0.0%)    | 1 (2.1%)    | 0 (0.0%)  |
|                    |                            |                          | Skin Rash   | 0 (0.0%)    | 0 (0.0%)    | 0 (0.0%)  |

The IMPROV Study – Supplementary Appendices

|                  |                                 |                           |                      |             |             |            |
|------------------|---------------------------------|---------------------------|----------------------|-------------|-------------|------------|
|                  |                                 | Poor appetite             | 0 (0.0%)             | 4 (8.5%)    | 7 (14.3%)   |            |
|                  |                                 | Abdominal Pain            | 0 (0.0%)             | 2 (4.3%)    | 2 (4.1%)    |            |
|                  |                                 | Myalgia / Arthralgia      | 1 (4.3%)             | 1 (2.1%)    | 6 (12.2%)   |            |
|                  |                                 | Fever                     | 2 (8.7%)             | 8 (17.0%)   | 11 (22.4%)  |            |
|                  |                                 | Passing dark urine        | 0 (0.0%)             | 0 (0.0%)    | 0 (0.0%)    |            |
|                  |                                 | Dizziness                 | 0 (0.0%)             | 1 (2.1%)    | 0 (0.0%)    |            |
|                  |                                 | Shortness of Breath       | 0 (0.0%)             | 0 (0.0%)    | 0 (0.0%)    |            |
|                  |                                 | Itching                   | 0 (0.0%)             | 0 (0.0%)    | 1 (2.0%)    |            |
|                  |                                 | Any GI symptoms [2]       | 1 (4.3%)             | 5 (10.6%)   | 8 (16.3%)   |            |
| <b>Ethiopia</b>  | <b>ET001<br/>Arba<br/>Minch</b> | Number [1]                | N=72                 | N=146       | N=147       |            |
|                  |                                 | Vomiting                  | 21 (29.2%)           | 36 (24.7%)  | 39 (26.5%)  |            |
|                  |                                 | Headache                  | 38 (52.8%)           | 78 (53.4%)  | 80 (54.4%)  |            |
|                  |                                 | Nausea                    | 39 (54.2%)           | 81 (55.5%)  | 74 (50.3%)  |            |
|                  |                                 | Diarrhoea                 | 8 (11.1%)            | 18 (12.3%)  | 12 (8.2%)   |            |
|                  |                                 | Skin Rash                 | 5 (6.9%)             | 10 (6.8%)   | 11 (7.5%)   |            |
|                  |                                 | Poor appetite             | 66 (91.7%)           | 132 (90.4%) | 127 (86.4%) |            |
|                  |                                 | Abdominal Pain            | 35 (48.6%)           | 60 (41.1%)  | 61 (41.5%)  |            |
|                  |                                 | Myalgia / Arthralgia      | 26 (36.1%)           | 47 (32.2%)  | 34 (23.1%)  |            |
|                  |                                 | Fever                     | 37 (51.4%)           | 73 (50.0%)  | 78 (53.1%)  |            |
|                  |                                 | Passing dark urine        | 15 (20.8%)           | 29 (19.9%)  | 33 (22.4%)  |            |
|                  |                                 | Dizziness                 | 41 (56.9%)           | 80 (54.8%)  | 74 (50.3%)  |            |
|                  |                                 | Shortness of Breath       | 11 (15.3%)           | 17 (11.6%)  | 15 (10.2%)  |            |
|                  |                                 | Itching                   | 8 (11.1%)            | 15 (10.3%)  | 11 (7.5%)   |            |
|                  | Any GI symptoms [2]             | 68 (94.4%)                | 136 (93.2%)          | 135 (91.8%) |             |            |
|                  |                                 | <b>ET002<br/>Metahara</b> | Number [1]           | N=40        | N=84        | N=84       |
|                  |                                 |                           | Vomiting             | 1 (2.5%)    | 7 (8.3%)    | 5 (6.0%)   |
|                  |                                 |                           | Headache             | 14 (35.0%)  | 29 (34.5%)  | 30 (35.7%) |
|                  |                                 |                           | Nausea               | 4 (10.0%)   | 11 (13.1%)  | 11 (13.1%) |
|                  |                                 |                           | Diarrhoea            | 0 (0.0%)    | 1 (1.2%)    | 1 (1.2%)   |
|                  |                                 |                           | Skin Rash            | 0 (0.0%)    | 0 (0.0%)    | 1 (1.2%)   |
|                  |                                 |                           | Poor appetite        | 8 (20.0%)   | 14 (16.7%)  | 21 (25.0%) |
|                  |                                 |                           | Abdominal Pain       | 2 (5.0%)    | 7 (8.3%)    | 5 (6.0%)   |
|                  |                                 |                           | Myalgia / Arthralgia | 1 (2.5%)    | 8 (9.5%)    | 8 (9.5%)   |
|                  |                                 |                           | Fever                | 11 (27.5%)  | 19 (22.6%)  | 26 (31.0%) |
|                  | Passing dark urine              |                           | 0 (0.0%)             | 0 (0.0%)    | 0 (0.0%)    |            |
|                  | Dizziness                       | 2 (5.0%)                  | 0 (0.0%)             | 1 (1.2%)    |             |            |
|                  | Shortness of Breath             | 1 (2.5%)                  | 0 (0.0%)             | 0 (0.0%)    |             |            |
|                  | Itching                         | 0 (0.0%)                  | 1 (1.2%)             | 1 (1.2%)    |             |            |
|                  | Any GI symptoms [2]             | 11 (27.5%)                | 26 (31.0%)           | 29 (34.5%)  |             |            |
| <b>Indonesia</b> | <b>ID004<br/>Hanura</b>         | Number [1]                | N=118                | N=228       | N=228       |            |
|                  |                                 | Vomiting                  | 16 (13.6%)           | 41 (18.0%)  | 30 (13.2%)  |            |
|                  |                                 | Headache                  | 56 (47.5%)           | 125 (54.8%) | 112 (49.1%) |            |
|                  |                                 | Nausea                    | 40 (33.9%)           | 92 (40.4%)  | 82 (36.0%)  |            |

The IMPROV Study – Supplementary Appendices

|                |                                                 |                           |             |             |             |      |
|----------------|-------------------------------------------------|---------------------------|-------------|-------------|-------------|------|
|                |                                                 | Diarrhoea                 | 4 (3.4%)    | 9 (3.9%)    | 2 (0.9%)    |      |
|                |                                                 | Skin Rash                 | 2 (1.7%)    | 1 (0.4%)    | 0 (0.0%)    |      |
|                |                                                 | Poor appetite             | 35 (29.7%)  | 83 (36.4%)  | 73 (32.0%)  |      |
|                |                                                 | Abdominal Pain            | 27 (22.9%)  | 65 (28.5%)  | 57 (25.0%)  |      |
|                |                                                 | Myalgia / Arthralgia      | 29 (24.6%)  | 63 (27.6%)  | 60 (26.3%)  |      |
|                |                                                 | Fever                     | 39 (33.1%)  | 73 (32.0%)  | 76 (33.3%)  |      |
|                |                                                 | Passing dark urine        | 2 (1.7%)    | 1 (0.4%)    | 3 (1.3%)    |      |
|                |                                                 | Dizziness                 | 14 (11.9%)  | 31 (13.6%)  | 36 (15.8%)  |      |
|                |                                                 | Shortness of Breath       | 1 (0.8%)    | 1 (0.4%)    | 0 (0.0%)    |      |
|                |                                                 | Itching                   | 0 (0.0%)    | 0 (0.0%)    | 0 (0.0%)    |      |
|                |                                                 | Any GI symptoms [2]       | 68 (57.6%)  | 137 (60.1%) | 132 (57.9%) |      |
|                |                                                 |                           |             |             |             |      |
|                | <b>ID005<br/>Tanjung<br/>Leidong</b>            | Number [1]                | N=85        | N=170       | N=169       |      |
|                |                                                 | Vomiting                  | 15 (17.6%)  | 43 (25.3%)  | 28 (16.6%)  |      |
|                |                                                 | Headache                  | 70 (82.4%)  | 137 (80.6%) | 134 (79.3%) |      |
|                |                                                 | Nausea                    | 56 (65.9%)  | 110 (64.7%) | 114 (67.5%) |      |
|                |                                                 | Diarrhoea                 | 2 (2.4%)    | 4 (2.4%)    | 0 (0.0%)    |      |
|                |                                                 | Skin Rash                 | 0 (0.0%)    | 0 (0.0%)    | 0 (0.0%)    |      |
|                |                                                 | Poor appetite             | 53 (62.4%)  | 105 (61.8%) | 103 (60.9%) |      |
|                |                                                 | Abdominal Pain            | 51 (60.0%)  | 110 (64.7%) | 101 (59.8%) |      |
|                |                                                 | Myalgia / Arthralgia      | 47 (55.3%)  | 89 (52.4%)  | 78 (46.2%)  |      |
|                |                                                 | Fever                     | 6 (7.1%)    | 7 (4.1%)    | 9 (5.3%)    |      |
|                |                                                 | Passing dark urine        | 0 (0.0%)    | 0 (0.0%)    | 0 (0.0%)    |      |
|                |                                                 | Dizziness                 | 5 (5.9%)    | 11 (6.5%)   | 14 (8.3%)   |      |
|                |                                                 | Shortness of Breath       | 0 (0.0%)    | 0 (0.0%)    | 0 (0.0%)    |      |
|                |                                                 | Itching                   | 0 (0.0%)    | 0 (0.0%)    | 1 (0.6%)    |      |
|                | Any GI symptoms [2]                             | 67 (78.8%)                | 125 (73.5%) | 128 (75.7%) |             |      |
|                |                                                 |                           |             |             |             |      |
| <b>Vietnam</b> | <b>VN001<br/>Dak O &amp;<br/>Bu Gia<br/>Map</b> | Number [1]                | N=43        | N=87        | N=89        |      |
|                |                                                 | Vomiting                  | 1 (2.3%)    | 2 (2.3%)    | 1 (1.1%)    |      |
|                |                                                 | Headache                  | 7 (16.3%)   | 14 (16.1%)  | 10 (11.2%)  |      |
|                |                                                 | Nausea                    | 0 (0.0%)    | 0 (0.0%)    | 0 (0.0%)    |      |
|                |                                                 | Diarrhoea                 | 1 (2.3%)    | 2 (2.3%)    | 0 (0.0%)    |      |
|                |                                                 | Skin Rash                 | 0 (0.0%)    | 1 (1.1%)    | 2 (2.2%)    |      |
|                |                                                 | Poor appetite             | 1 (2.3%)    | 1 (1.1%)    | 2 (2.2%)    |      |
|                |                                                 | Abdominal Pain            | 1 (2.3%)    | 3 (3.4%)    | 2 (2.2%)    |      |
|                |                                                 | Myalgia / Arthralgia      | 0 (0.0%)    | 0 (0.0%)    | 0 (0.0%)    |      |
|                |                                                 | Fever                     | 7 (16.3%)   | 17 (19.5%)  | 17 (19.1%)  |      |
|                |                                                 | Passing dark urine        | 0 (0.0%)    | 0 (0.0%)    | 0 (0.0%)    |      |
|                |                                                 | Dizziness                 | 0 (0.0%)    | 1 (1.1%)    | 0 (0.0%)    |      |
|                |                                                 | Shortness of Breath       | 0 (0.0%)    | 0 (0.0%)    | 0 (0.0%)    |      |
|                |                                                 | Itching                   | 0 (0.0%)    | 0 (0.0%)    | 2 (2.2%)    |      |
|                | Any GI symptoms [2]                             | 3 (7.0%)                  | 7 (8.0%)    | 5 (5.6%)    |             |      |
|                |                                                 |                           |             |             |             |      |
|                |                                                 | <b>VN002<br/>Krong Pa</b> | Number [1]  | N=21        | N=41        | N=43 |
|                | Vomiting                                        |                           | 0 (0.0%)    | 1 (2.4%)    | 0 (0.0%)    |      |



The IMPROV Study – Supplementary Appendices

|                                                                                                 |                      |            |            |            |
|-------------------------------------------------------------------------------------------------|----------------------|------------|------------|------------|
|                                                                                                 | Headache             | 7 (33.3%)  | 21 (51.2%) | 14 (32.6%) |
|                                                                                                 | Nausea               | 0 (0.0%)   | 0 (0.0%)   | 0 (0.0%)   |
|                                                                                                 | Diarrhoea            | 0 (0.0%)   | 0 (0.0%)   | 0 (0.0%)   |
|                                                                                                 | Skin Rash            | 0 (0.0%)   | 0 (0.0%)   | 0 (0.0%)   |
|                                                                                                 | Poor appetite        | 0 (0.0%)   | 0 (0.0%)   | 0 (0.0%)   |
|                                                                                                 | Abdominal Pain       | 0 (0.0%)   | 1 (2.4%)   | 0 (0.0%)   |
|                                                                                                 | Myalgia / Arthralgia | 0 (0.0%)   | 2 (4.9%)   | 0 (0.0%)   |
|                                                                                                 | Fever                | 13 (61.9%) | 31 (75.6%) | 27 (62.8%) |
|                                                                                                 | Passing dark urine   | 0 (0.0%)   | 1 (2.4%)   | 0 (0.0%)   |
|                                                                                                 | Dizziness            | 0 (0.0%)   | 0 (0.0%)   | 0 (0.0%)   |
|                                                                                                 | Shortness of Breath  | 0 (0.0%)   | 0 (0.0%)   | 0 (0.0%)   |
|                                                                                                 | Itching              | 0 (0.0%)   | 0 (0.0%)   | 0 (0.0%)   |
|                                                                                                 | Any GI symptoms [2]  | 0 (0.0%)   | 2 (4.9%)   | 0 (0.0%)   |
| [1]: Number of patients with daily symptoms questionnaires during treatment                     |                      |            |            |            |
| [2]: Composite of any of the following: nausea, vomiting, anorexia, diarrhoea or abdominal pain |                      |            |            |            |

## 24. Symptoms elicited from daily questionnaires during treatment – Days 4 to 14

The proportion of patients reporting each symptom at least once between days 4 and 14

|                    | Site                       | Outcome measure          | Control     | PQ7         | PQ14        |          |
|--------------------|----------------------------|--------------------------|-------------|-------------|-------------|----------|
| <b>Overall</b>     |                            | Number [1]               | N=456       | N=914       | N=930       |          |
|                    |                            | Vomiting                 | 14 (3.0%)   | 72 (7.7%)   | 47 (5.0%)   |          |
|                    |                            | Headache                 | 93 (20.0%)  | 236 (25.2%) | 201 (21.5%) |          |
|                    |                            | Nausea                   | 41 (8.8%)   | 143 (15.3%) | 105 (11.2%) |          |
|                    |                            | Diarrhoea                | 11 (2.4%)   | 67 (7.2%)   | 39 (4.2%)   |          |
|                    |                            | Skin Rash                | 8 (1.7%)    | 15 (1.6%)   | 16 (1.7%)   |          |
|                    |                            | Poor appetite            | 53 (11.4%)  | 179 (19.1%) | 129 (13.8%) |          |
|                    |                            | Abdominal Pain           | 45 (9.7%)   | 282 (30.2%) | 172 (18.4%) |          |
|                    |                            | Myalgia / Arthralgia     | 23 (5.0%)   | 71 (7.6%)   | 60 (6.4%)   |          |
|                    |                            | Fever                    | 36 (7.8%)   | 80 (8.6%)   | 93 (9.9%)   |          |
|                    |                            | Passing dark urine       | 7 (1.5%)    | 27 (2.9%)   | 18 (1.9%)   |          |
|                    |                            | Dizziness                | 33 (7.1%)   | 77 (8.2%)   | 56 (6.0%)   |          |
|                    |                            | Shortness of Breath      | 6 (1.3%)    | 17 (1.8%)   | 14 (1.5%)   |          |
|                    |                            | Itching                  | 8 (1.7%)    | 12 (1.3%)   | 9 (1.0%)    |          |
|                    | Any GI symptoms [2]        | 92 (19.8%)               | 372 (39.8%) | 259 (27.6%) |             |          |
| <b>Afghanistan</b> | <b>AF001<br/>Jalalabad</b> | Number [1]               | N=57        | N=116       | N=123       |          |
|                    |                            | Vomiting                 | 0 (0.0%)    | 7 (6.0%)    | 4 (3.3%)    |          |
|                    |                            | Headache                 | 3 (5.3%)    | 12 (10.3%)  | 5 (4.1%)    |          |
|                    |                            | Nausea                   | 0 (0.0%)    | 12 (10.3%)  | 3 (2.4%)    |          |
|                    |                            | Diarrhoea                | 0 (0.0%)    | 5 (4.3%)    | 2 (1.6%)    |          |
|                    |                            | Skin Rash                | 0 (0.0%)    | 0 (0.0%)    | 0 (0.0%)    |          |
|                    |                            | Poor appetite            | 1 (1.8%)    | 14 (12.1%)  | 3 (2.4%)    |          |
|                    |                            | Abdominal Pain           | 0 (0.0%)    | 18 (15.5%)  | 8 (6.5%)    |          |
|                    |                            | Myalgia / Arthralgia     | 2 (3.5%)    | 5 (4.3%)    | 3 (2.4%)    |          |
|                    |                            | Fever                    | 3 (5.3%)    | 1 (0.9%)    | 3 (2.4%)    |          |
|                    |                            | Passing dark urine       | 0 (0.0%)    | 3 (2.6%)    | 1 (0.8%)    |          |
|                    |                            | Dizziness                | 1 (1.8%)    | 8 (6.9%)    | 4 (3.3%)    |          |
|                    |                            | Shortness of Breath      | 0 (0.0%)    | 2 (1.7%)    | 0 (0.0%)    |          |
|                    |                            | Itching                  | 0 (0.0%)    | 0 (0.0%)    | 0 (0.0%)    |          |
|                    | Any GI symptoms [2]        | 1 (1.8%)                 | 23 (19.8%)  | 11 (8.9%)   |             |          |
|                    |                            | <b>AF008<br/>Laghman</b> | Number [1]  | N=23        | N=46        | N=49     |
|                    |                            |                          | Vomiting    | 0 (0.0%)    | 2 (4.3%)    | 1 (2.0%) |
|                    |                            |                          | Headache    | 0 (0.0%)    | 0 (0.0%)    | 1 (2.0%) |
|                    |                            |                          | Nausea      | 0 (0.0%)    | 1 (2.2%)    | 1 (2.0%) |
|                    |                            |                          | Diarrhoea   | 0 (0.0%)    | 2 (4.3%)    | 1 (2.0%) |
|                    |                            | Skin Rash                | 0 (0.0%)    | 0 (0.0%)    | 0 (0.0%)    |          |

The IMPROV Study – Supplementary Appendices

|                  |                                 |                      |            |            |            |
|------------------|---------------------------------|----------------------|------------|------------|------------|
|                  |                                 | Poor appetite        | 0 (0.0%)   | 2 (4.3%)   | 1 (2.0%)   |
|                  |                                 | Abdominal Pain       | 0 (0.0%)   | 3 (6.5%)   | 2 (4.1%)   |
|                  |                                 | Myalgia / Arthralgia | 0 (0.0%)   | 0 (0.0%)   | 1 (2.0%)   |
|                  |                                 | Fever                | 0 (0.0%)   | 1 (2.2%)   | 1 (2.0%)   |
|                  |                                 | Passing dark urine   | 0 (0.0%)   | 0 (0.0%)   | 0 (0.0%)   |
|                  |                                 | Dizziness            | 0 (0.0%)   | 0 (0.0%)   | 0 (0.0%)   |
|                  |                                 | Shortness of Breath  | 0 (0.0%)   | 0 (0.0%)   | 0 (0.0%)   |
|                  |                                 | Itching              | 0 (0.0%)   | 0 (0.0%)   | 0 (0.0%)   |
|                  |                                 | Any GI symptoms [2]  | 0 (0.0%)   | 4 (8.7%)   | 3 (6.1%)   |
| <b>Ethiopia</b>  | <b>ET001<br/>Arba<br/>Minch</b> | Number [1]           | N=71       | N=143      | N=146      |
|                  |                                 | Vomiting             | 9 (12.7%)  | 23 (16.1%) | 14 (9.6%)  |
|                  |                                 | Headache             | 16 (22.5%) | 40 (28.0%) | 36 (24.7%) |
|                  |                                 | Nausea               | 16 (22.5%) | 39 (27.3%) | 28 (19.2%) |
|                  |                                 | Diarrhoea            | 7 (9.9%)   | 27 (18.9%) | 22 (15.1%) |
|                  |                                 | Skin Rash            | 5 (7.0%)   | 12 (8.4%)  | 10 (6.8%)  |
|                  |                                 | Poor appetite        | 35 (49.3%) | 69 (48.3%) | 59 (40.4%) |
|                  |                                 | Abdominal Pain       | 17 (23.9%) | 62 (43.4%) | 49 (33.6%) |
|                  |                                 | Myalgia / Arthralgia | 8 (11.3%)  | 19 (13.3%) | 14 (9.6%)  |
|                  |                                 | Fever                | 6 (8.5%)   | 16 (11.2%) | 16 (11.0%) |
|                  |                                 | Passing dark urine   | 4 (5.6%)   | 16 (11.2%) | 14 (9.6%)  |
|                  |                                 | Dizziness            | 22 (31.0%) | 37 (25.9%) | 26 (17.8%) |
|                  |                                 | Shortness of Breath  | 3 (4.2%)   | 5 (3.5%)   | 3 (2.1%)   |
|                  |                                 | Itching              | 5 (7.0%)   | 11 (7.7%)  | 6 (4.1%)   |
|                  |                                 | Any GI symptoms [2]  | 43 (60.6%) | 93 (65.0%) | 90 (61.6%) |
|                  | <b>ET002<br/>Metahara</b>       | Number [1]           | N=39       | N=84       | N=84       |
|                  |                                 | Vomiting             | 0 ( 0.0%)  | 8 ( 9.5%)  | 0 ( 0.0%)  |
|                  |                                 | Headache             | 6 (15.4%)  | 12 (14.3%) | 7 ( 8.3%)  |
|                  |                                 | Nausea               | 0 ( 0.0%)  | 6 ( 7.1%)  | 0 ( 0.0%)  |
|                  |                                 | Diarrhoea            | 0 ( 0.0%)  | 2 ( 2.4%)  | 2 ( 2.4%)  |
|                  |                                 | Skin Rash            | 0 ( 0.0%)  | 1 ( 1.2%)  | 0 ( 0.0%)  |
|                  |                                 | Poor appetite        | 1 ( 2.6%)  | 10 (11.9%) | 1 ( 1.2%)  |
|                  |                                 | Abdominal Pain       | 0 ( 0.0%)  | 13 (15.5%) | 4 ( 4.8%)  |
|                  |                                 | Myalgia / Arthralgia | 0 ( 0.0%)  | 3 ( 3.6%)  | 1 ( 1.2%)  |
|                  |                                 | Fever                | 2 ( 5.1%)  | 1 ( 1.2%)  | 2 ( 2.4%)  |
|                  |                                 | Passing dark urine   | 0 ( 0.0%)  | 0 ( 0.0%)  | 0 ( 0.0%)  |
|                  |                                 | Dizziness            | 0 ( 0.0%)  | 0 ( 0.0%)  | 1 ( 1.2%)  |
|                  |                                 | Shortness of Breath  | 0 ( 0.0%)  | 0 ( 0.0%)  | 1 ( 1.2%)  |
|                  |                                 | Itching              | 0 ( 0.0%)  | 0 ( 0.0%)  | 0 ( 0.0%)  |
|                  |                                 | Any GI symptoms [2]  | 1 ( 2.6%)  | 21 (25.0%) | 6 ( 7.1%)  |
| <b>Indonesia</b> | <b>ID004<br/>Hanura</b>         | Number [1]           | N=118      | N=228      | N=228      |
|                  |                                 | Vomiting             | 4 (3.4%)   | 11 (4.8%)  | 21 (9.2%)  |
|                  |                                 | Headache             | 36 (30.5%) | 82 (36.0%) | 80 (35.1%) |
|                  |                                 | Nausea               | 15 (12.7%) | 35 (15.4%) | 43 (18.9%) |

The IMPROV Study – Supplementary Appendices

|                |                                                 |                      |            |             |            |
|----------------|-------------------------------------------------|----------------------|------------|-------------|------------|
|                |                                                 | Diarrhoea            | 3 (2.5%)   | 10 (4.4%)   | 9 (3.9%)   |
|                |                                                 | Skin Rash            | 3 (2.5%)   | 0 (0.0%)    | 5 (2.2%)   |
|                |                                                 | Poor appetite        | 10 (8.5%)  | 44 (19.3%)  | 40 (17.5%) |
|                |                                                 | Abdominal Pain       | 18 (15.3%) | 99 (43.4%)  | 61 (26.8%) |
|                |                                                 | Myalgia / Arthralgia | 9 (7.6%)   | 20 (8.8%)   | 29 (12.7%) |
|                |                                                 | Fever                | 17 (14.4%) | 41 (18.0%)  | 50 (21.9%) |
|                |                                                 | Passing dark urine   | 3 (2.5%)   | 7 (3.1%)    | 2 (0.9%)   |
|                |                                                 | Dizziness            | 8 (6.8%)   | 21 (9.2%)   | 19 (8.3%)  |
|                |                                                 | Shortness of Breath  | 3 (2.5%)   | 10 (4.4%)   | 10 (4.4%)  |
|                |                                                 | Itching              | 3 (2.5%)   | 0 (0.0%)    | 1 (0.4%)   |
|                |                                                 | Any GI symptoms [2]  | 30 (25.4%) | 121 (53.1%) | 90 (39.5%) |
|                |                                                 |                      |            |             |            |
|                | <b>ID005<br/>Tanjung<br/>Leidong</b>            | Number [1]           | N=84       | N=170       | N=169      |
|                |                                                 | Vomiting             | 1 (1.2%)   | 12 (7.1%)   | 6 (3.6%)   |
|                |                                                 | Headache             | 32 (38.1%) | 89 (52.4%)  | 71 (42.0%) |
|                |                                                 | Nausea               | 10 (11.9%) | 44 (25.9%)  | 30 (17.8%) |
|                |                                                 | Diarrhoea            | 1 (1.2%)   | 8 (4.7%)    | 1 (0.6%)   |
|                |                                                 | Skin Rash            | 0 (0.0%)   | 0 (0.0%)    | 0 (0.0%)   |
|                |                                                 | Poor appetite        | 6 (7.1%)   | 32 (18.8%)  | 25 (14.8%) |
|                |                                                 | Abdominal Pain       | 10 (11.9%) | 61 (35.9%)  | 41 (24.3%) |
|                |                                                 | Myalgia / Arthralgia | 4 (4.8%)   | 24 (14.1%)  | 12 (7.1%)  |
|                |                                                 | Fever                | 6 (7.1%)   | 11 (6.5%)   | 14 (8.3%)  |
|                |                                                 | Passing dark urine   | 0 (0.0%)   | 0 (0.0%)    | 1 (0.6%)   |
|                |                                                 | Dizziness            | 2 (2.4%)   | 11 (6.5%)   | 6 (3.6%)   |
|                |                                                 | Shortness of Breath  | 0 (0.0%)   | 0 (0.0%)    | 0 (0.0%)   |
|                |                                                 | Itching              | 0 (0.0%)   | 0 (0.0%)    | 1 (0.6%)   |
|                | Any GI symptoms [2]                             | 17 (20.2%)           | 78 (45.9%) | 51 (30.2%)  |            |
|                |                                                 |                      |            |             |            |
| <b>Vietnam</b> | <b>VN001<br/>Dak O &amp;<br/>Bu Gia<br/>Map</b> | Number [1]           | N=43       | N=86        | N=89       |
|                |                                                 | Vomiting             | 0 (0.0%)   | 7 (8.1%)    | 1 (1.1%)   |
|                |                                                 | Headache             | 0 (0.0%)   | 1 (1.2%)    | 1 (1.1%)   |
|                |                                                 | Nausea               | 0 (0.0%)   | 5 (5.8%)    | 0 (0.0%)   |
|                |                                                 | Diarrhoea            | 0 (0.0%)   | 11 (12.8%)  | 2 (2.2%)   |
|                |                                                 | Skin Rash            | 0 (0.0%)   | 2 (2.3%)    | 1 (1.1%)   |
|                |                                                 | Poor appetite        | 0 (0.0%)   | 5 (5.8%)    | 0 (0.0%)   |
|                |                                                 | Abdominal Pain       | 0 (0.0%)   | 22 (25.6%)  | 6 (6.7%)   |
|                |                                                 | Myalgia / Arthralgia | 0 (0.0%)   | 0 (0.0%)    | 0 (0.0%)   |
|                |                                                 | Fever                | 2 (4.7%)   | 7 (8.1%)    | 7 (7.9%)   |
|                |                                                 | Passing dark urine   | 0 (0.0%)   | 1 (1.2%)    | 0 (0.0%)   |
|                |                                                 | Dizziness            | 0 (0.0%)   | 0 (0.0%)    | 0 (0.0%)   |
|                |                                                 | Shortness of Breath  | 0 (0.0%)   | 0 (0.0%)    | 0 (0.0%)   |
|                |                                                 | Itching              | 0 (0.0%)   | 1 (1.2%)    | 1 (1.1%)   |
|                | Any GI symptoms [2]                             | 0 (0.0%)             | 28 (32.6%) | 7 (7.9%)    |            |
|                |                                                 |                      |            |             |            |
|                | <b>VN002<br/>Krong Pa</b>                       | Number [1]           | N=21       | N=41        | N=42       |
|                |                                                 | Vomiting             | 0 (0.0%)   | 2 (4.9%)    | 0 (0.0%)   |

The IMPROV Study – Supplementary Appendices

|                                                                                                 |  |                      |          |          |          |
|-------------------------------------------------------------------------------------------------|--|----------------------|----------|----------|----------|
|                                                                                                 |  | Headache             | 0 (0.0%) | 0 (0.0%) | 0 (0.0%) |
|                                                                                                 |  | Nausea               | 0 (0.0%) | 1 (2.4%) | 0 (0.0%) |
|                                                                                                 |  | Diarrhoea            | 0 (0.0%) | 2 (4.9%) | 0 (0.0%) |
|                                                                                                 |  | Skin Rash            | 0 (0.0%) | 0 (0.0%) | 0 (0.0%) |
|                                                                                                 |  | Poor appetite        | 0 (0.0%) | 3 (7.3%) | 0 (0.0%) |
|                                                                                                 |  | Abdominal Pain       | 0 (0.0%) | 4 (9.8%) | 1 (2.4%) |
|                                                                                                 |  | Myalgia / Arthralgia | 0 (0.0%) | 0 (0.0%) | 0 (0.0%) |
|                                                                                                 |  | Fever                | 0 (0.0%) | 2 (4.9%) | 0 (0.0%) |
|                                                                                                 |  | Passing dark urine   | 0 (0.0%) | 0 (0.0%) | 0 (0.0%) |
|                                                                                                 |  | Dizziness            | 0 (0.0%) | 0 (0.0%) | 0 (0.0%) |
|                                                                                                 |  | Shortness of Breath  | 0 (0.0%) | 0 (0.0%) | 0 (0.0%) |
|                                                                                                 |  | Itching              | 0 (0.0%) | 0 (0.0%) | 0 (0.0%) |
|                                                                                                 |  | Any GI symptoms [2]  | 0 (0.0%) | 4 (9.8%) | 1 (2.4%) |
| [1]: Number of patients with daily symptoms questionnaires during treatment                     |  |                      |          |          |          |
| [2]: Composite of any of the following: nausea, vomiting, anorexia, diarrhoea or abdominal pain |  |                      |          |          |          |

**25. Distribution of haemoglobin (g/dL) during follow up by treatment arm**

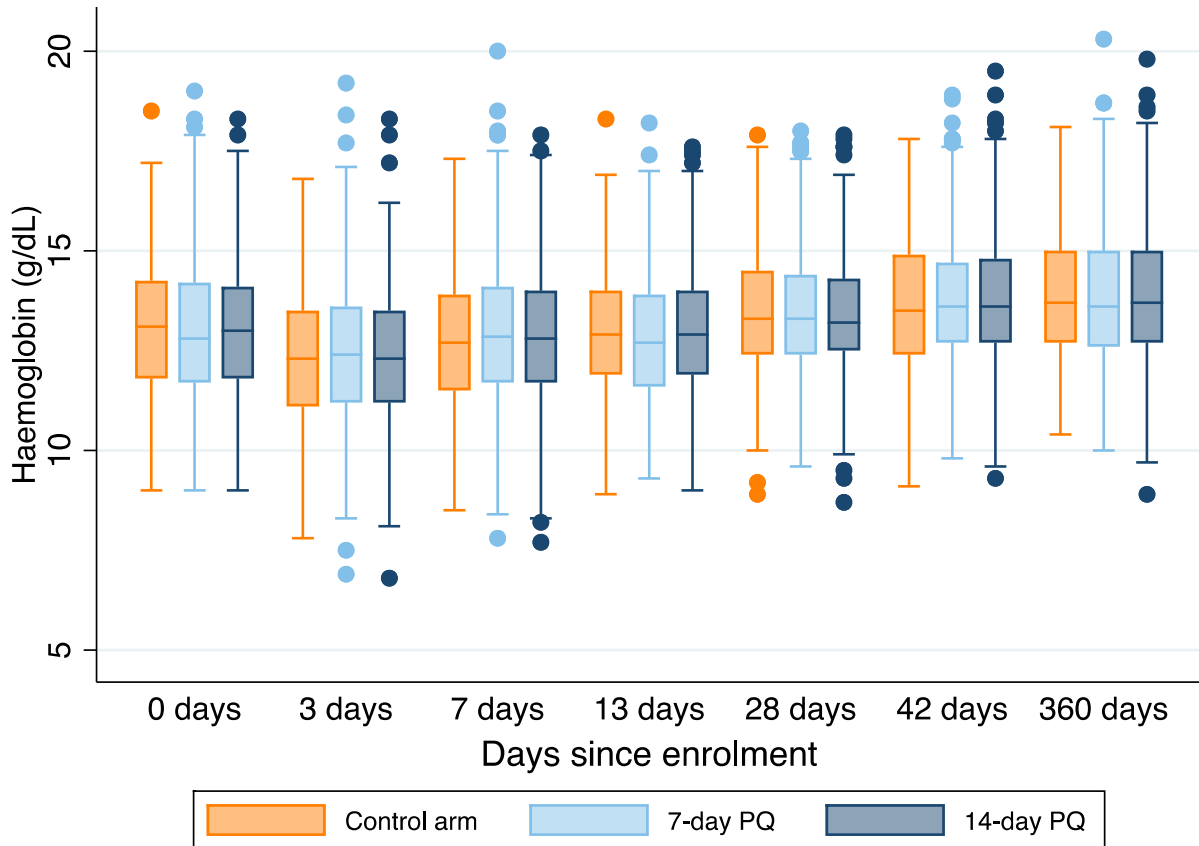

Boxes represent 25<sup>th</sup> and 75<sup>th</sup> percentiles.

## 26. Haemoglobin Profile by Treatment Arm

|                                                                                        | Control       | PQ7                          | PQ14                         |
|----------------------------------------------------------------------------------------|---------------|------------------------------|------------------------------|
| Number of patients                                                                     | 464           | 935                          | 937                          |
| Incidence risk of severe anaemia (<7 g/dL) or transfusion within 365 days (95% CI) [N] | [N = 0]       | 0.40 (0.13, 1.30)<br>[N = 3] | 0.11 (0.02, 0.77)<br>[N = 1] |
| Hb drop >5g/dL within 7 days of initial treatment N (%)                                | 0 (0.00)      | 0 (0.00)                     | 1 (0.00)                     |
| Hb nadir within 28 days of treatment initiation, g/dL , mean[SD]                       | 11.96 [1.6]   | 11.92 [1.6]                  | 11.86 [1.6]                  |
| Time to Hb nadir, days, median (range)                                                 | 3 (3 - 7)     | 3 (3 - 13)                   | 3 (3 - 13)                   |
| <b>Day 0</b>                                                                           |               |                              |                              |
| Number of Patients                                                                     | 464           | 934                          | 937                          |
| Hb on day 0, g/dL, mean[SD]                                                            | 13.04 [1.7]   | 12.96 [1.8]                  | 12.94 [1.7]                  |
| <b>Day 3</b>                                                                           |               |                              |                              |
| Number of Patients                                                                     | 432           | 891                          | 895                          |
| Hb on day 3, g/dL , mean[SD]                                                           | 12.31 [1.7]   | 12.41 [1.7]                  | 12.30 [1.7]                  |
| Change in Hb between Day 0 and Day 3, g/dL, mean[SD]                                   | -0.72 [1.12]  | -0.52 [1.19]                 | -0.62 [1.09]                 |
| Absolute drop between Day 0 and Day 3 >5 g/dL, N (%)                                   | 0 (0.00)      | 0 (0.00)                     | 1 (0.11)                     |
| Fractional change in Hb between Day 0 and Day 3, %, mean[SD]                           | -5.26 [8.64]  | -3.60 [9.17]                 | -4.53 [8.47]                 |
| Fractional drop between Day 0 and Day 3 >25%, N (%)                                    | 3 (0.69)      | 8 (0.89)                     | 8 (0.89)                     |
| <b>Day 7</b>                                                                           |               |                              |                              |
| Number of patients                                                                     | 447           | 882                          | 888                          |
| Hb on day 7, g/dL , mean[SD]                                                           | 12.72 [1.7]   | 12.91 [1.8]                  | 12.81 [1.7]                  |
| Change in Hb between Day 0 and Day 7, g/dL, mean[SD]                                   | -0.31 [1.20]  | -0.01 [1.23]                 | -0.12 [1.09]                 |
| Absolute drop between Day 0 and Day 7 >5 g/dL, N (%)                                   | 0 (0.00)      | 0 (0.00)                     | 0 (0.00)                     |
| Fractional change in Hb between Day 0 and Day 7, % , mean[SD]                          | -2.08 [9.01]  | 0.32 [9.58]                  | -0.62 [8.72]                 |
| Fractional drop between Day 0 and Day 7 >25%, N (%)                                    | 2 (0.45)      | 9 (1.02)                     | 2 (0.23)                     |
| <b>Day 13</b>                                                                          |               |                              |                              |
| Number of patients                                                                     | 438           | 852                          | 866                          |
| Hb on day 13, g/dL , mean[SD]                                                          | 12.97 [1.6]   | 12.82 [1.6]                  | 12.98 [1.5]                  |
| Change in Hb between Day 0 and Day 13, g/dL, mean[SD]                                  | -0.07 [ 1.23] | -0.10 [ 1.26]                | 0.07 [ 1.15]                 |
| Absolute drop between Day 0 and Day 13 >5 g/dL, N (%)                                  | 0 (0.00)      | 1 (0.12)                     | 0 (0.00)                     |

|                                                               |               |               |              |
|---------------------------------------------------------------|---------------|---------------|--------------|
| Fractional change in Hb between Day 0 and Day 13, %, mean[SD] | -0.02 [ 9.48] | -0.08 [ 9.85] | 1.08 [ 9.30] |
| Fractional drop between Day 0 and Day 13 >25%, N (%)          | 0 (0.00)      | 3 (0.35)      | 2 (0.23)     |
| <b>Day 28</b>                                                 |               |               |              |
| Number of patients                                            | 396           | 817           | 813          |
| Hb on day 28, g/dL , mean[SD]                                 | 13.43 [1.6]   | 13.47 [1.5]   | 13.38 [1.5]  |
| <b>Day 42</b>                                                 |               |               |              |
| Number of patients                                            | 377           | 785           | 773          |
| Hb on day 42, g/dL , mean[SD]                                 | 13.63 [1.7]   | 13.75 [1.5]   | 13.76 [1.6]  |
